# Supplementary material for: Yonemitsu-type condensations catalysed by proline and Eu(OTf)3
Source: Royal Society of Chemistry journal article supplement (doi:10.1039/c4ra08853k), 2014-01-01
Supplement: c4ra08853k1.pdf [file c4ra08853k1.pdf]

## Yonemitsu-type condensations catalysed by proline and Eu(OTf)<sub>3</sub>

Andrea Renzetti,<sup>\*a</sup> Emanuela Boffa,<sup>b</sup> Marco Colazzo,<sup>b</sup> Stéphane Gérard,<sup>c</sup>  
Janos Sapi,<sup>c</sup> Tak-Hang Chan,<sup>d</sup> Hiroshi Nakazawa,<sup>a</sup> Claudio Villani<sup>e</sup> and Antonella FONTANA<sup>b</sup>

[renzetti@sci.osaka.cu-ac.jp](mailto:renzetti@sci.osaka.cu-ac.jp)

Tel + 6-6605-2513

Fax + 6-6605-2513

<sup>a</sup> Department of Chemistry, Osaka City University, 3-3-138 Sugimoto, Sumiyoshi-ku, 558-8585 Osaka, Japan

<sup>b</sup> Dipartimento di Farmacia, Università "G. d'Annunzio" di Chieti-Pescara, via dei Vestini 31, I-66100 Chieti, Italy

<sup>c</sup> Institut de Chimie Moléculaire de Reims, UMR CNRS 6229, Université de Reims-Champagne-Ardenne, Faculté de Pharmacie, 51 rue Cognacq-Jay, F-51096 Reims, Cedex, France

<sup>d</sup> Department of Chemistry, McGill University, 801 Sherbrooke Street West, H3A 0B8 Montreal, QC, Canada

<sup>e</sup> Dipartimento di Chimica e Tecnologia del Farmaco, Università "La Sapienza", P.le A. Moro, I-00185 Roma, Italy

## Supplementary Information

### Contents

|                                                                                                                      |      |
|----------------------------------------------------------------------------------------------------------------------|------|
| General information                                                                                                  | S-2  |
| General procedure for the trimolecular condensation                                                                  | S-2  |
| Preparation of <b>1-9b</b> and <b>14</b>                                                                             | S-3  |
| NMR spectra of <b>1-6b</b> and <b>8-9b</b>                                                                           | S-8  |
| Table S1. Trimolecular condensation various solvents                                                                 | S-24 |
| Table S2. Trimolecular condensation in the presence of various europium salts                                        | S-24 |
| Table S3. Trimolecular condensation in the presence of various amounts of Eu(OTf) <sub>3</sub> and <i>L</i> -proline | S-25 |
| Table S4. Environmental factor (E-factor) for the trimolecular condensation in the presence of Eu(III) and Ti(IV)    | S-25 |

## General information

Lanthanum *tris*-dodecylsulfate was prepared according to literature procedure.<sup>1</sup> All reagents were obtained from Aldrich, Acros, and Alfa Aesar, and used without further purification. Solvents were dried and purified by standard literature methods prior to use. Reactions under ultrasounds were performed in a sonicating bath (Cole Parmer, 100W, 42 kHz  $\pm$  6%). All reactions were monitored by thin layer chromatography (TLC) using precoated plates (Merck silica gel 60 F-254, 0.25 mm). TLCs were visualised using UV light (254 nm) first, then a solution of ammonium cerium sulfate in sulfuric acid and nitric acid under heating. Column chromatography was performed on Merck silica gel 60 (particle size 0.040-0.063 mm, 70-230 mesh). Chiral HPLC was done on a Chiralcel OD-H column following the procedure reported in the literature.<sup>2</sup>

Melting points were determined on a hot-stage Reichert Thermovar apparatus and are uncorrected. <sup>1</sup>H and <sup>13</sup>C NMR spectra were recorded on a Bruker spectrometer (300 or 400 MHz and 75 or 100 MHz, respectively) at room temperature. NMR chemical shifts ( $\delta$ ) were reported in parts per million (ppm) and referenced to TMS as an internal standard or the solvent residual signals. IR spectra were measured on KBr pastille with a Bomem FTIR instrument and reported in wave numbers (cm<sup>-1</sup>). Mass spectra (MS) and high resolution mass spectra (HRMS) were obtained on a VG Autospec mass spectrometer with electron-spray ionization (ESI) or electronic impact (EI) at -70 eV. Elemental analyses were performed on a FISONs Instrument EA 108 or a Perkin Elmer 240C elemental analyser.

## General procedure for the trimolecular condensation

*L*-proline (0.1 eq) was dissolved in alcohol (20 mL) under stirring at room temperature in the presence of molecular sieves 4Å (3.00 g). Active methylene compound (1.0 equiv.) and isobutyraldehyde (1.0 equiv.) were added to the solution. After 24 h of stirring at room temperature, indole (1.0 equiv.) and Lewis acid (0.1 equiv.) were added. After an additional 120 h of stirring, the mixture was filtered over celite to remove molecular sieves. The filtrate was concentrated at reduced pressure. Purification of the crude mixture by flash chromatography or recrystallisation afforded the condensation product.

---

<sup>1</sup> K. Deleersnyder, D. Shi, K. Binnemans and T. N. Parac-Vogt, *J. Alloys Comp.* 2008, **451**, 418-421.

<sup>2</sup> J. Zhou and T. Yong, *J. Am. Chem. Soc.* 2002, **124**, 9030-9031.

## Preparation of 1–9b and 14

### (2*R*\*,3*S*\*)-Methyl 2-acetyl-3-(1*H*-indol-3-yl)-4-methylpentanoate (1)

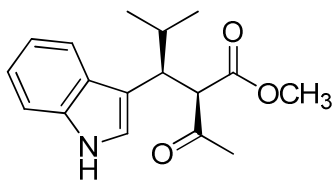

Prepared according to the general procedure using methanol, *L*-proline (101 mg, 0.87 mmol), methyl acetoacetate (946  $\mu$ L, 8.76 mmol), isobutyraldehyde (800  $\mu$ L, 8.76 mmol), indole (1.025 g, 8.76 mmol), and  $\text{Eu}(\text{OTf})_3$  (521 mg, 0.87 mmol). Purification of the crude mixture by flash chromatography on silica gel (petroleum ether/ethyl acetate = 9/1 $\rightarrow$ 8/2) followed by recrystallisation from a mixture of hexane/ethyl acetate [1/4 (v/v)] afforded **1** as a white solid (1.963 g, 78% yield). Spectroscopic data of **1** are consistent with those reported in the literature.<sup>3</sup>  $^1\text{H}$  NMR ( $\text{CDCl}_3$ , 400 MHz):  $\delta$  0.85 (d, 6H,  $J = 5.6$  Hz), 1.91 (s, 3H), 2.01 (m, 1H), 3.78 (s, 3H), 3.89 (dd, 1H,  $J = 12.0$  Hz,  $J = 3.9$  Hz), 4.07 (d, 1H,  $J = 12.0$  Hz), 6.89 (d, 1H,  $J = 2.4$  Hz), 7.11–7.20 (m, 3H), 7.34 (d, 1H,  $J = 7.6$  Hz), 7.68 (d, 1H,  $J = 7.6$  Hz), 8.17 (br, 1H). ESI-HRMS calcd. for  $\text{C}_{17}\text{H}_{21}\text{NNaO}_3$  [ $\text{M} + \text{Na}$ ] $^+$ : 310.1418; found: 310.1414.

### Ethyl 3-(1*H*-indol-3-yl)-4-methyl-2-(methanesulfonyl)pentanoate (2)

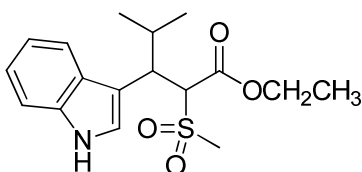

Prepared according to general procedure using ethanol, *L*-proline (101 mg, 0.87 mmol), ethyl methanesulfonyl acetate (1.16 mL, 8.76 mmol), isobutyraldehyde (800  $\mu$ L, 8.76 mmol), indole (1.025 g, 8.76 mmol), and  $\text{Bi}(\text{OTf})_3$  (574 mg, 0.87 mmol). Purification of the crude mixture by flash chromatography on silica gel (petroleum ether/ethyl acetate = 9/1 $\rightarrow$ 8/2) afforded **2** as a brown liquid (1.182 g, 40% yield).  $^1\text{H}$  NMR ( $\text{CDCl}_3$ , 300 MHz):  $\delta$  1.01 (d, 3H,  $J = 6.6$  Hz), 1.12 (d, 3H,  $J = 6.6$  Hz), 2.65 (m, 1H), 3.16 (dd, 1H,  $J = 8.4$  Hz,  $J = 3.8$  Hz), 3.17 (s, 1H), 4.26 (d, 1H,  $J = 8.4$  Hz), 4.36 (q, 2H,  $J = 7.1$  Hz), 7.00–7.16 (m, 4H), 7.64 (d, 1H,  $J = 7.9$  Hz), 7.93 (br, 1H, NH).  $^{13}\text{C}$  NMR ( $\text{CDCl}_3$ , 75 MHz):  $\delta$  13.8, 21.4, 21.6, 29.2, 32.7, 43.0, 62.1, 81.8, 110.8, 118.6, 119.3, 119.4, 121.2, 121.5, 127.5, 136.0, 160.6. IR (KBr):  $\nu(\text{cm}^{-1}) = 3413, 2962, 1714, 1455, 1310, 1214, 1133, 740$ . MS (EI):  $m/z$  (%) 360 (20), 291 (40), 288 (40), 252 (30), 245 (20), 174 (100), 167 (20), 123 (20). EI-HRMS calcd for  $\text{C}_{17}\text{H}_{23}\text{NO}_4\text{S}$  [ $\text{M}$ ] $^+$ : 337.1348; found 337.1328.

<sup>3</sup> A. Renzetti, E. Dardennes, A. Fontana, P. De Maria, J. Sapi and S. Gérard, *J. Org. Chem.* 2008, **73**, 6824-6827.

### (2*R*\*,3*R*\*)-Ethyl 3-(1*H*-indol-3-yl)-4-methyl-2-nitropentanoate (**3**)

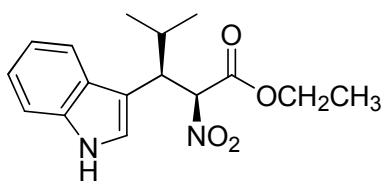

A 10-mL microwave vial was charged with *L*-proline (101 mg, 0.87 mmol), ethyl nitroacetate (972  $\mu$ L, 8.76 mmol), isobutyraldehyde (800  $\mu$ L, 8.76 mmol), and indole (1.025 g, 8.76 mmol). The vial was sealed and dimmed in an ultrasonic bath at room temperature

during 12 h. Purification of the crude mixture by flash chromatography on silica gel (petroleum ether/ethyl acetate = 9/1 $\rightarrow$ 7/3) followed by recrystallisation from a mixture of diethyl ether/petroleum ether [1/5 (v/v)] afforded **3** as a pale yellow solid (826 mg, 38% yield). Spectroscopic data of **1** are consistent with those reported in the literature.<sup>3</sup> <sup>1</sup>H NMR (CDCl<sub>3</sub>, 400 MHz):  $\delta$  0.91 (d, 3H, *J* = 6.8 Hz), 0.94 (d, 3H, *J* = 6.7 Hz), 1.23 (t, 3H, *J* = 6.8 Hz), 2.14 (m, 1H), 3.99 (dd, 1H, *J* = 10.1 Hz, *J* = 5.6 Hz), 4.22 (m, 2H), 5.64 (d, 1H, *J* = 10.1 Hz), 7.12–7.18 (m, 3H), 7.33 (d, 1H, 8.0 Hz), 7.64 (d, 1H, *J* = 7.6 Hz), 8.14 (br, 1H). ESI-HRMS calcd. for C<sub>16</sub>H<sub>20</sub>KN<sub>2</sub>O<sub>4</sub> [M + K]<sup>+</sup>: 343.1060; found: 343.1055.

### 3-(1-(1*H*-Indol-3-yl)-2-methylpropyl)pentane-2,4-dione (**4**)

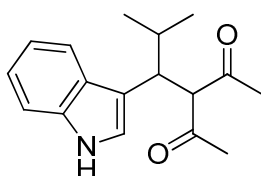

Prepared according to general procedure using methanol, *L*-proline (101 mg, 0.87 mmol), pentane-2,4-dione (900  $\mu$ L, 8.76 mmol), isobutyraldehyde (800  $\mu$ L, 8.76 mmol), indole (1.025 g, 8.76 mmol), and Bi(OTf)<sub>3</sub> (574 mg, 0.87 mmol). Purification of the crude mixture by flash chromatography on silica

gel (petroleum ether/ethyl acetate = 9/1 $\rightarrow$ 8/2) afforded **3** as a red-brown liquid (357 mg, 15% yield). <sup>1</sup>H NMR (CDCl<sub>3</sub>, 300 MHz):  $\delta$  0.81 (d, 6H, *J* = 6.8 Hz), 1.78 (s, 3H), 1.89 (m, 1H), 2.34 (s, 3H), 3.99 (dd, 1H, *J* = 12.2 Hz, *J* = 3.6 Hz), 4.41 (d, 1H, *J* = 12.2 Hz), 6.84–7.69 (m, 5H), 8.39 (br, 1H). <sup>13</sup>C NMR (CDCl<sub>3</sub>, 75 MHz):  $\delta$  17.2, 22.2, 27.4, 30.5, 30.8, 41.7, 74.0, 111.1, 112.2, 119.3, 119.6, 122.0, 123.2, 128.3, 135.6, 204.1, 204.2. IR (KBr) :  $\nu$  (cm<sup>-1</sup>) 3405, 2959, 1692, 1457, 1355, 1190, 743. MS (EI): *m/z* (%) 271 (M<sup>+</sup>, 10), 226 (10), 186 (100), 172 (40), 170 (15), 130 (10). EI-HRMS calcd for C<sub>17</sub>H<sub>21</sub>NO<sub>2</sub> [M]<sup>+</sup>: 271.1572; found: 271.1587.

### Ethyl 2-benzoyl-3-(1*H*-indol-3-yl)-4-methylpentanoate (**5**)

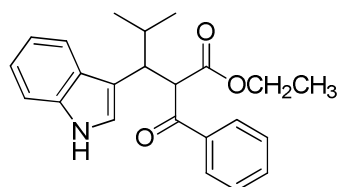

Prepared according to general procedure using ethanol, *L*-proline (101 mg, 0.87 mmol), ethyl benzoylacetate (1673  $\mu$ L, 8.76 mmol), isobutyraldehyde (800  $\mu$ L, 8.76 mmol), 1.0, 25 g (8.76 mmol) of

indole, and 521 mg (0.87 mmol) of  $\text{Eu}(\text{OTf})_3$ . Purification of the crude mixture by flash chromatography on silica gel (petroleum ether/ethyl acetate = 9/1 $\rightarrow$ 8/2) afforded **5** as a white solid (636 mg, 20% yield). mp 174–176 °C.  $^1\text{H}$  NMR ( $\text{CDCl}_3$ , 400 MHz):  $\delta$  0.57 (t, 3H,  $J$  = 7.2 Hz), 0.80 (d, 3H,  $J$  = 6.8 Hz), 0.83 (d, 3H,  $J$  = 6.8 Hz), 2.03 (m, 1H), 3.64 (dq, 2H,  $J$  = 7.2 Hz,  $J$  = 3.6 Hz), 4.19 (dd, 1H,  $J$  = 11.6 Hz,  $J$  = 5.2 Hz), 5.04 (d, 1H,  $J$  = 11.6 Hz), 7.09–7.18 (m, 3H), 7.33 (d, 1H,  $J$  = 8.0 Hz), 7.49–7.53 (m, 2H), 7.61 (m, 1H), 7.74 (d, 1H,  $J$  = 8.0 Hz), 8.08 (br, 1H), 8.16 (d, 2H,  $J$  = 7.2 Hz).  $^{13}\text{C}$  NMR ( $\text{CDCl}_3$ , 100 MHz):  $\delta$  13.2, 18.2, 22.2, 30.6, 41.9, 58.9, 61.1, 110.7, 113.5, 119.3, 120.0, 121.7, 122.9, 128.7, 128.8, 133.6, 135.6, 136.9, 168.3, 194.1. IR (KBr):  $\nu$  ( $\text{cm}^{-1}$ ) 3237, 3014, 2999, 1724, 1684, 1223, 1158. MS (EI):  $m/z$  (%) 363  $[\text{M}]^+$ , 320, 274, 171, 130, 105, 77. EI-HRMS calcd for  $\text{C}_{23}\text{H}_{25}\text{NO}_3$   $[\text{M}]^+$ : 363.1834; found: 363.1826.

### Methyl 2-((1*H*-indol-3-yl)(phenyl)methyl)-3-oxobutanoate (**6a**, **6b**)

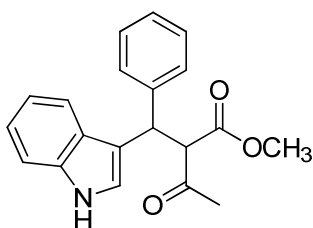

Prepared according to general procedure using methanol, *L*-proline (50.5 mg, 0.44 mmol), methyl acetoacetate (473  $\mu\text{L}$ , 4.38 mmol), benzaldehyde (447  $\mu\text{L}$ , 4.38 mmol), indole (513 mg, 4.38 mmol), and  $\text{Eu}(\text{OTf})_3$  (260 mg, 0.44 mmol). Purification of the crude mixture by flash chromatography on silica gel (hexane $\rightarrow$ hexane/ethyl acetate = 8/2) afforded **6a** as a pale yellow solid and **6b** as a yellow solid (182 and 183 mg, respectively; 26% overall yield). **6a**: mp 128–130 °C.  $^1\text{H}$  NMR ( $\text{CDCl}_3$ , 400 MHz):  $\delta$  2.14 (s, 3H), 3.52 (s, 3H), 4.42 (d, 1H,  $J$  = 12.0 Hz), 5.08 (d, 1H,  $J$  = 12.0 Hz), 7.05–7.36 (m, 9H), 7.54 (d, 1H,  $J$  = 11.6 Hz), 8.13 (br, 1H).  $^{13}\text{C}$  NMR ( $\text{CDCl}_3$ , 100 MHz):  $\delta$  28.4, 43.0, 52.5, 66.5, 111.4, 116.0, 119.1, 119.8, 121.7, 122.5, 126.5, 127.0, 128.0, 128.6, 136.4, 141.5, 168.8, 203.4. IR (KBr):  $\nu$  ( $\text{cm}^{-1}$ ) 3385, 1753, 1459, 1357, 1282, 1243, 1172, 756, 702. Anal. calcd. for  $\text{C}_{20}\text{H}_{19}\text{NO}_3$ : C 74.75; H 5.96; N 4.36; found: C 74.41; H 6.20; N 4.27. **6b**: mp 166–168 °C.  $^1\text{H}$  NMR ( $\text{CDCl}_3$ , 400 MHz):  $\delta$  2.02 (s, 3H), 3.54 (s, 3H), 4.52 (d, 1H,  $J$  = 11.6 Hz), 5.10 (d, 1H,  $J$  = 11.6 Hz), 7.01–7.32 (m, 9H), 7.52 (d, 1H,  $J$  = 7.6 Hz), 8.06 (br, 1H);  $^{13}\text{C}$  NMR ( $\text{CDCl}_3$ , 100 MHz):  $\delta$  30.6, 42.9, 52.7, 65.7, 111.2, 117.2, 119.4, 119.6, 120.8, 122.4, 126.6, 127.0, 128.3, 128.8, 136.4, 141.4, 168.8, 202.6. IR (KBr):  $\nu$  ( $\text{cm}^{-1}$ ) 3388, 1744, 1714, 1459, 1407, 1360, 1295, 1246, 1173, 1145, 760, 705. Anal. calcd. for  $\text{C}_{20}\text{H}_{19}\text{NO}_3$ : C 74.75; H 5.96; N 4.36; found: C 74.54; H 6.23; N 4.27.

### Methyl 2-((1*H*-indol-3-yl)(2-nitrophenyl)methyl)-3-oxobutanoate (**7a**, **7b**)

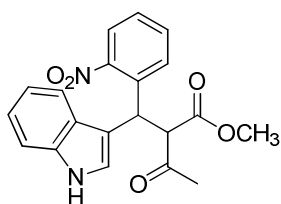

Prepared according to general procedure using methanol, *L*-proline (48 mg, 0.4 mmol), methyl acetoacetate (432  $\mu$ L, 4 mmol), 2-nitrobenzaldehyde (616 mg, 4 mmol), indole (468 mg, 4 mmol), and Eu(OTf)<sub>3</sub> (243 mg, 0.4 mmol). Purification of the crude mixture by flash chromatography on silica gel (hexane/ethyl acetate = 8/2) afforded an inseparable mixture of **7a** and **7b** (513 mg, 35% yield; 55/45 diastereomeric mixture). Spectroscopic data of **7a** and **7b** are consistent with those reported in the literature.<sup>4</sup> <sup>1</sup>H NMR (CDCl<sub>3</sub>, 300 MHz):  $\delta$  2.11 (s, 3H) (2.15), 3.52 (s, 3H) (3.56), 4.40 (d,  $J$  = 12.1 Hz, 1H) (4.61), 5.91 (d,  $J$  = 12.1 Hz, 1H) (5.98), 7.05–7.80 (m, 9H), 8.09 (br, 1H) (8.12).

### Methyl 2-acetyl-4-methyl-3-(1*H*-pyrrol-2-yl)pentanoate (**8**)

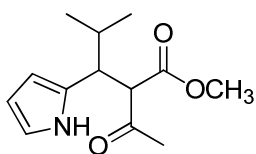

Prepared according to general procedure using methanol, *L*-proline (50.5 mg, 0.44 mmol), methyl acetoacetate (473  $\mu$ L, 4.38 mmol), isobutyraldehyde (400  $\mu$ L, 4.38 mmol), pyrrole (304  $\mu$ L, 4.38 mmol), and Eu(OTf)<sub>3</sub> (260 mg, 0.44 mmol). Purification of the crude mixture by flash chromatography on silica gel (hexane $\rightarrow$ hexane/ethyl acetate = 8/2) afforded **7** as a white solid (488 mg, 47% yield). mp 126–128 °C. <sup>1</sup>H NMR (CDCl<sub>3</sub>, 400 MHz):  $\delta$  0.82 (d, 3H,  $J$  = 6.8 Hz), 0.86 (d, 3H,  $J$  = 6.8 Hz), 1.98 (m, 1H), 2.07 (s, 3H), 3.24 (dd, 1H,  $J$  = 16.4 Hz,  $J$  = 9.2 Hz), 3.68 (s, 3H), 4.02 (d, 1H,  $J$  = 9.2 Hz), 5.85 (m, 1H), 6.06 (m, 1H), 6.65 (m, 1H), 8.46 (br, 1H); <sup>13</sup>C NMR (CDCl<sub>3</sub>, 100 MHz):  $\delta$  18.5, 21.5, 29.9, 30.0, 45.5, 52.6, 62.3, 107.4, 107.9, 117.0, 128.7, 169.6, 203.6. IR (KBr):  $\nu$  (cm<sup>-1</sup>) 3376, 2964, 1744, 1431, 1359, 1315, 1260, 1215, 1149, 1031, 998, 727. Anal. calcd. for C<sub>13</sub>H<sub>19</sub>NO<sub>3</sub>: C 65.80; H 8.07; N 5.90; found: C 65.70; H 8.14; N 5.85.

### Ethyl 4-methyl-3-(5-methylfuran-2-yl)-2-nitropentanoate (**9a**, **9b**)

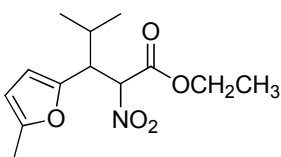

Prepared according to general procedure using methanol, *L*-proline (48 mg, 0.4 mmol), ethyl nitroacetate (450  $\mu$ L, 4 mmol), isobutyraldehyde (370  $\mu$ L, 4 mmol), 2-methylfuran (360  $\mu$ L, 4 mmol), and Eu(OTf)<sub>3</sub> (243 mg, 0.4 mmol). Purification of the crude mixture by flash chromatography on silica gel (CH<sub>2</sub>Cl<sub>2</sub>/ethyl acetate = 95/5) afforded an inseparable mixture of **9a** and **9b** as a pale yellow liquid (295 mg, 35% yield; diastereomeric mixture 55/45). <sup>1</sup>H NMR (CDCl<sub>3</sub>, 300 MHz):  $\delta$  0.80 (d, 3H,  $J$  = 3.0 Hz), 0.82 (d, 3H,  $J$  = 3.0 Hz), 0.83 (d, 3H,  $J$  = 1.8 Hz), 0.85 (d, 3H,  $J$  = 1.8 Hz), 1.02 (t, 3H,  $J$  = 6.9 Hz), 1.21 (t, 3H,  $J$  = 6.9 Hz), 1.83 (m, 2H), 2.10 (d, 3H,  $J$  = 0.9 Hz), 2.12 (d, 3H,  $J$  = 0.9 Hz), 3.50 (dd, 1H,  $J$

<sup>4</sup> S. Gérard, A. Renzetti, B. Lefèvre, A. Fontana, P. De Maria and J. Sapi, *Tetrahedron*, 2010, **66**, 3065-3069.

= 10.5 Hz,  $J = 4.0$  Hz), 3.54 (dd, 1H,  $J = 10.5$  Hz,  $J = 4.5$  Hz), 3.90 (dq, 2H,  $J = 6.9$  Hz,  $J = 2.1$  Hz), 4.12 (dq, 2H,  $J = 6.9$  Hz,  $J = 1.2$  Hz), 5.31 (d, 1H,  $J = 10.5$  Hz), 5.33 (d, 1H,  $J = 10.5$  Hz), 5.62 (m, 2H), 5.79 (d, 1H,  $J = 3.0$  Hz), 5.81 (d, 1H,  $J = 3.0$  Hz).  $^{13}\text{C}$  NMR ( $\text{CDCl}_3$ , 75 MHz):  $\delta$  13.5 (13.8), 17.7 (17.9), 21.0 (21.5), 28.8 (28.7), 46.1, 62.9 (63.1), 88.9 (89.4), 106.0 (106.1), 110.3 (109.9), 147.0 (147.6), 151.9 (151.7), 163.4 (163.7). IR (KBr):  $\nu$  ( $\text{cm}^{-1}$ ) 2985, 1764, 1548, 1204, 1035. MS (EI):  $m/z$  (%) 269  $[\text{M}]^{+\bullet}$ , 222, 136, 121, 94. EI-HRMS calcd for  $\text{C}_{13}\text{H}_{19}\text{NO}_5$   $[\text{M}]^{+\bullet}$ : 269.1263; found: 269.1279.

### Methyl 2-acetyl-4-methylpent-2-enoate (**14**)

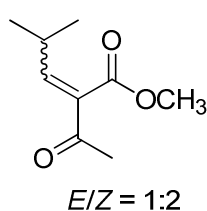

*L*-proline (101 mg, 0.87 mmol, 0.1 equiv.) was dissolved in methanol (20 mL) under stirring at room temperature in the presence of molecular sieves 4Å. Methyl acetoacetate (946  $\mu\text{L}$ , 8.76 mmol, 1.0 equiv.) and isobutyraldehyde (800  $\mu\text{L}$ , 8.76 mmol, 1.0 equiv.) were added to the solution. After 24 h of stirring at room temperature, the mixture was filtered over celite to remove molecular sieves. The filtrate was concentrated at reduced pressure. Purification of the crude mixture by flash chromatography (hexane/diethyl ether = 6/4) afforded **14** as an uncoloured liquid (mixture of diastereomers,  $E/Z = 1:2$ , 625 mg, 37% yield). Spectroscopic data of **14** are in agreement with those reported in the literature.<sup>5</sup>  $^1\text{H}$  NMR ( $\text{CDCl}_3$ , 400 MHz) isomer *E*:  $\delta$  1.02 (d, 6H,  $J = 6.8$  Hz), 2.33 (s, 3H), 2.61 (m, 1H), 3.75 (s, 3H), 6.68 (d, 1H,  $J = 10.4$  Hz); isomer *Z*:  $\delta$  1.05 (d, 6H,  $J = 6.4$  Hz), 2.28 (s, 3H), 2.65 (m, 1H), 3.80 (s, 3H), 6.59 (d, 1H,  $J = 10.0$  Hz). ESI-HRMS calcd. for  $\text{C}_9\text{H}_{14}\text{NaO}_3$   $[\text{M} + \text{Na}]^+$ : 193.0835; found: 193.0835.

### Preparation of **1** from **14**

Compound **14** (71 mg, 417  $\mu\text{mol}$ , 1.0 equiv.) was dissolved in methanol (5 mL) under stirring at room temperature in the presence of molecular sieves 4Å. Indole (48.9 mg, 417  $\mu\text{mol}$ , 1.0 equiv.) and  $\text{Eu}(\text{OTf})_3$  (24.6 mg, 41.7  $\mu\text{mol}$ , 0.1 equiv.) were added to the solution. After five days of stirring at room temperature, the mixture was filtered over celite<sup>®</sup> to remove molecular sieves. The filtrate was concentrated at reduced pressure. Purification of the crude mixture by PTLC on silica gel (petroleum ether/ethyl acetate = 8/2) afforded **1** as a white solid (12 mg, 10% yield). Spectroscopic data of **1** are consistent with those reported in the literature.<sup>3</sup>

<sup>5</sup> R. Antonioletti, P. Bovicelli and S. Melancona *Tetrahedron* 2002, **58**, 589-596.

# NMR spectra of 1-6b and 8-9b

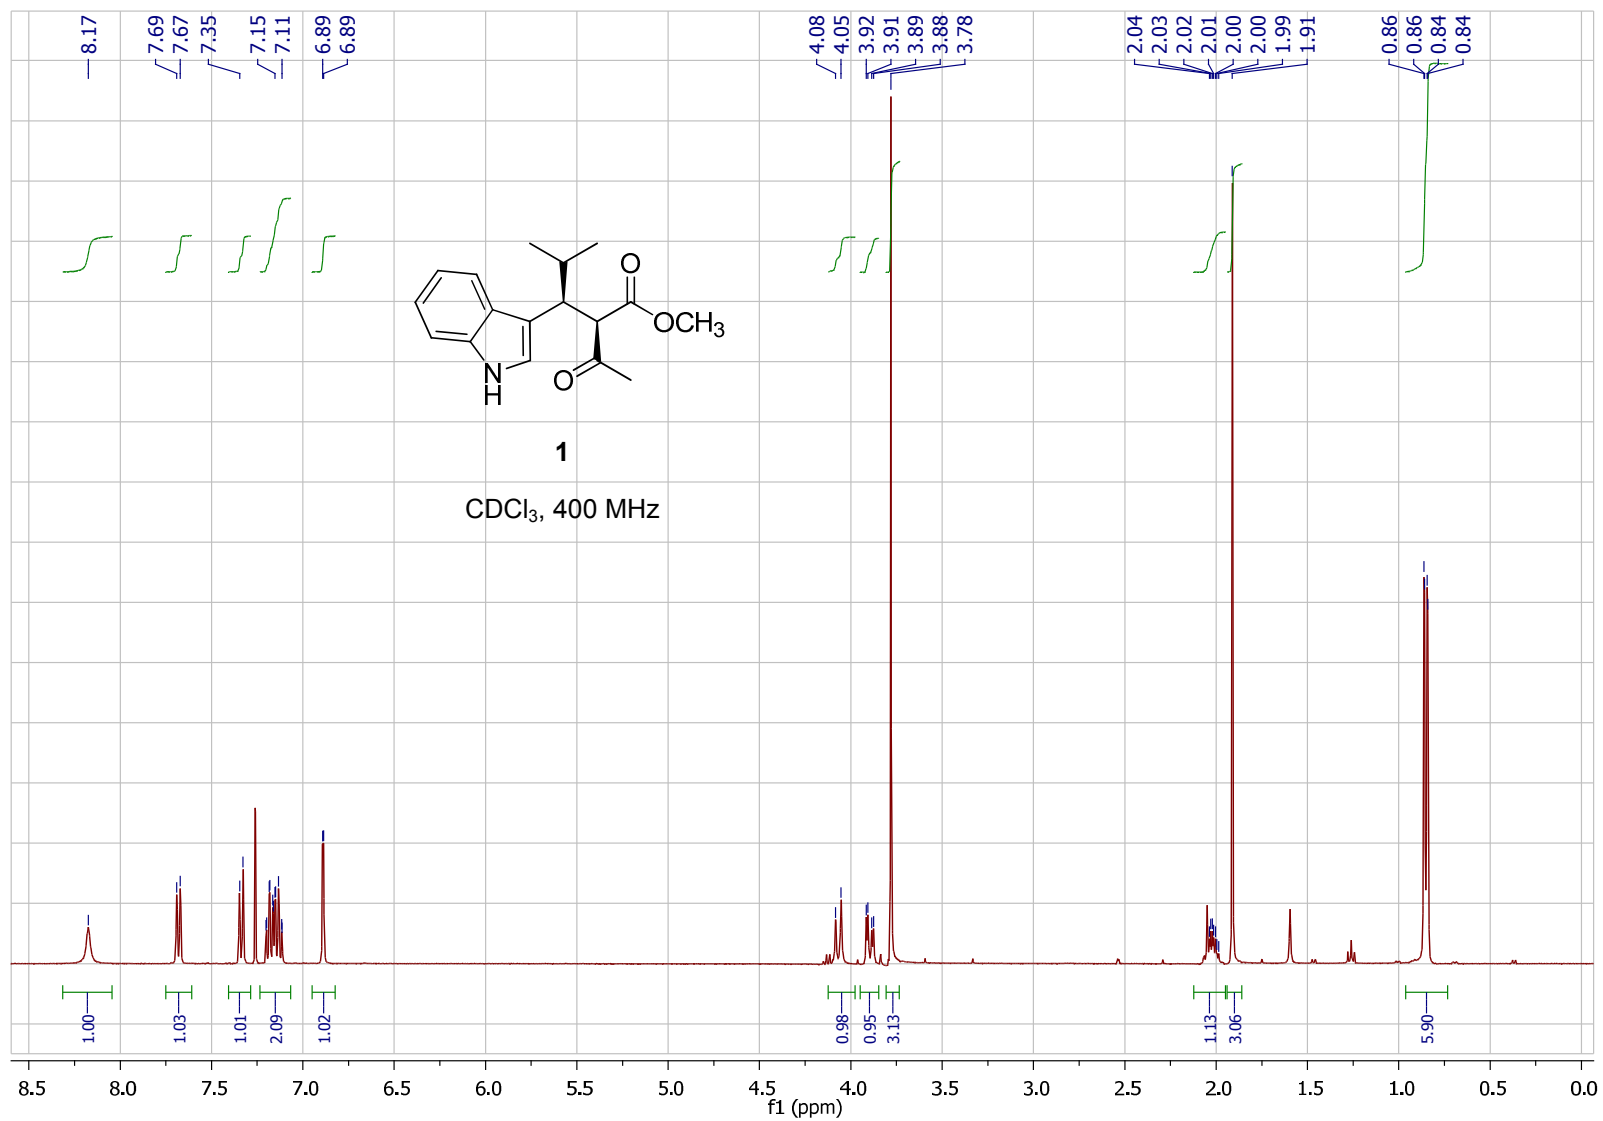



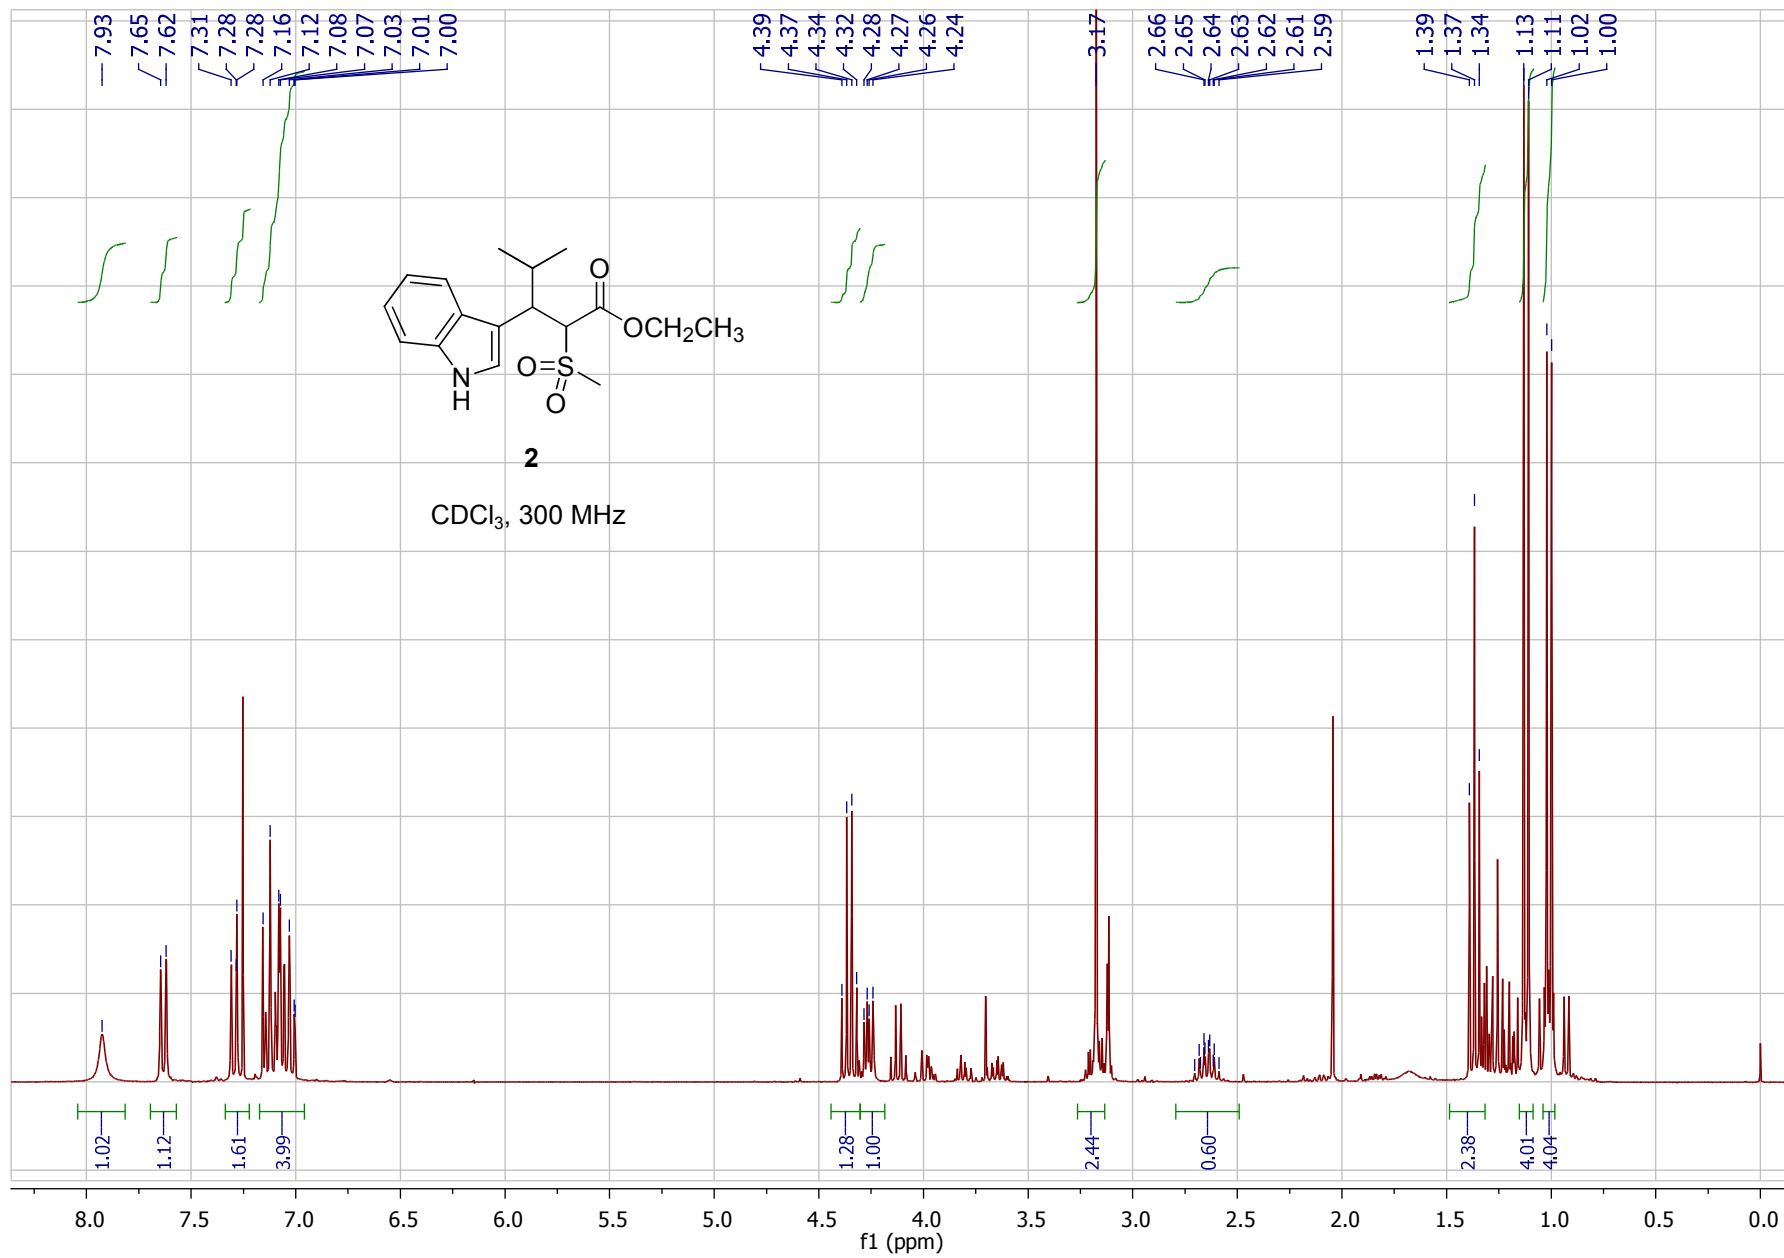

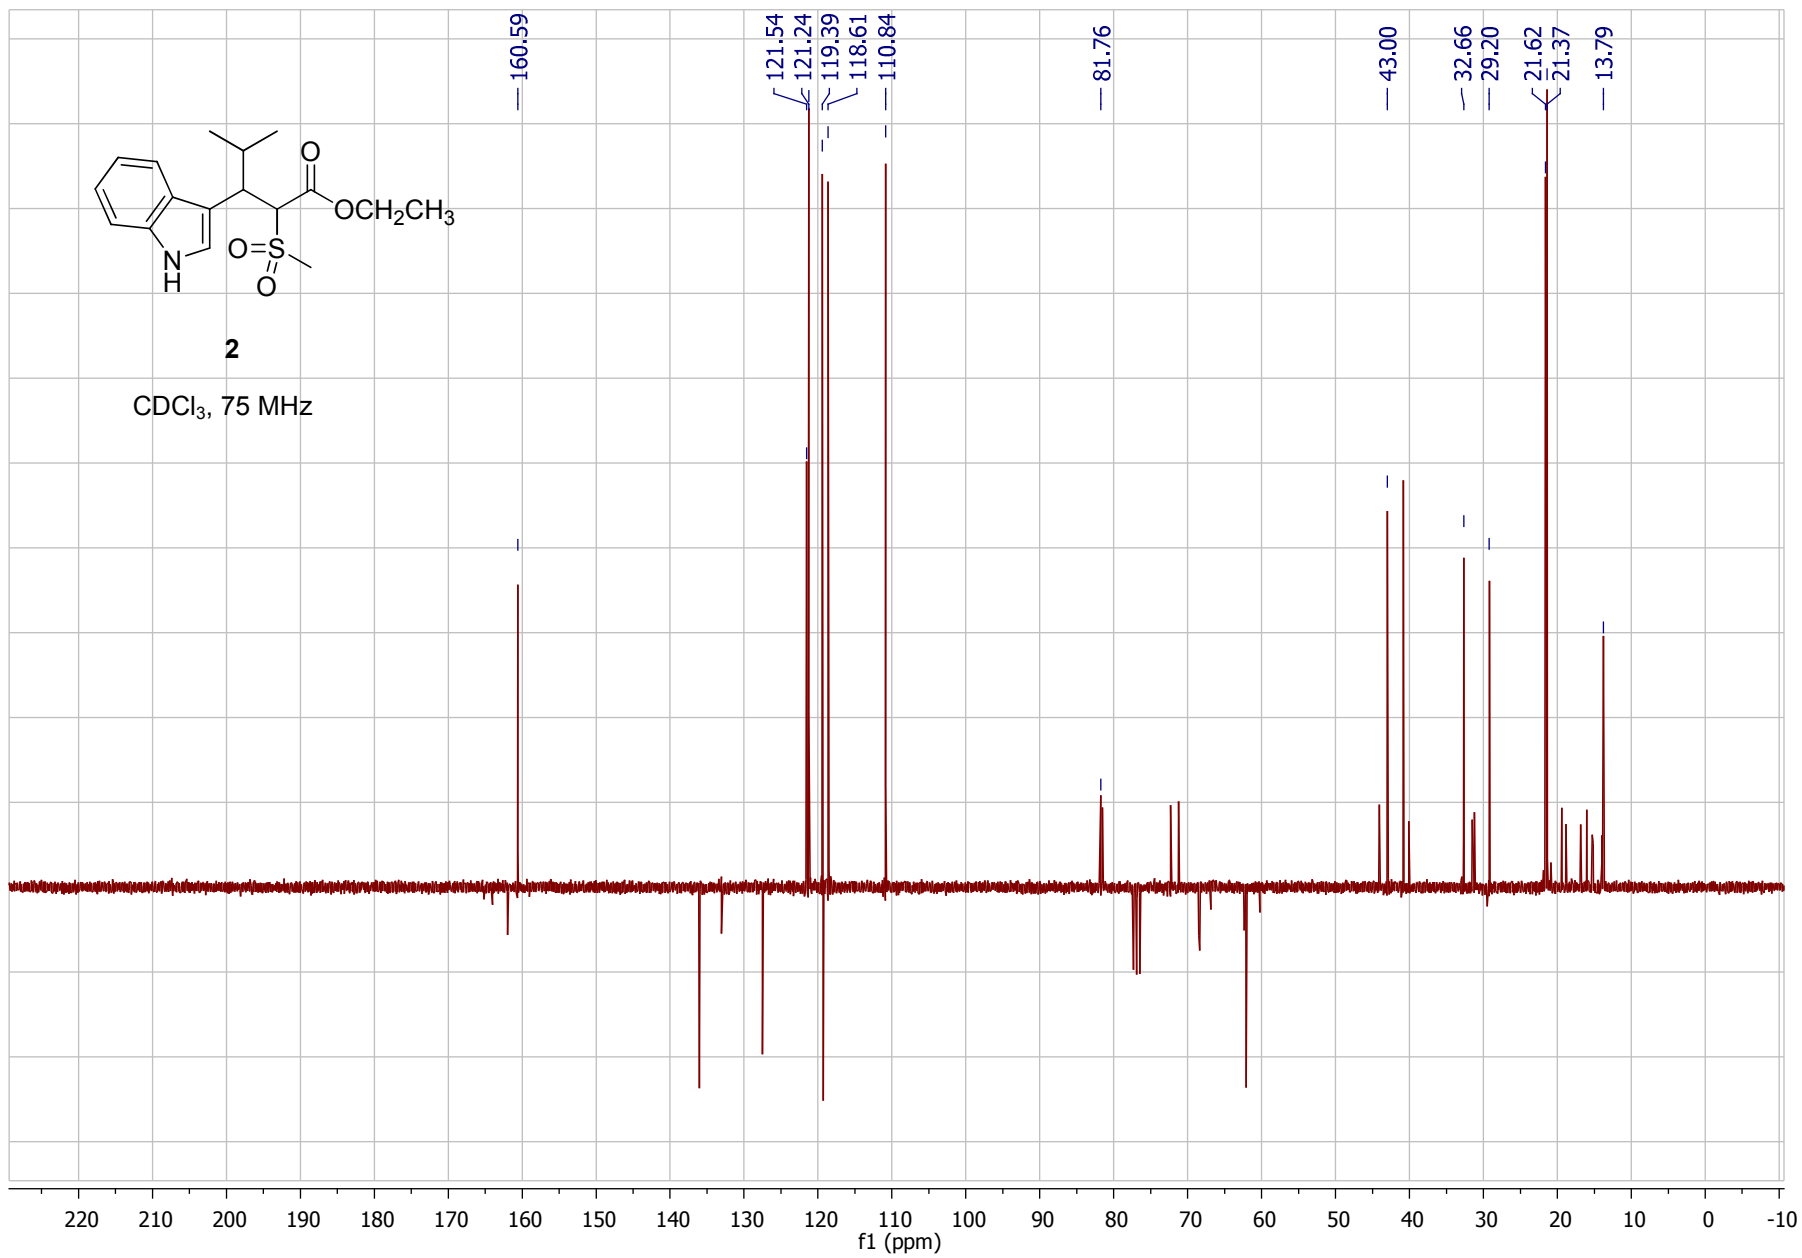

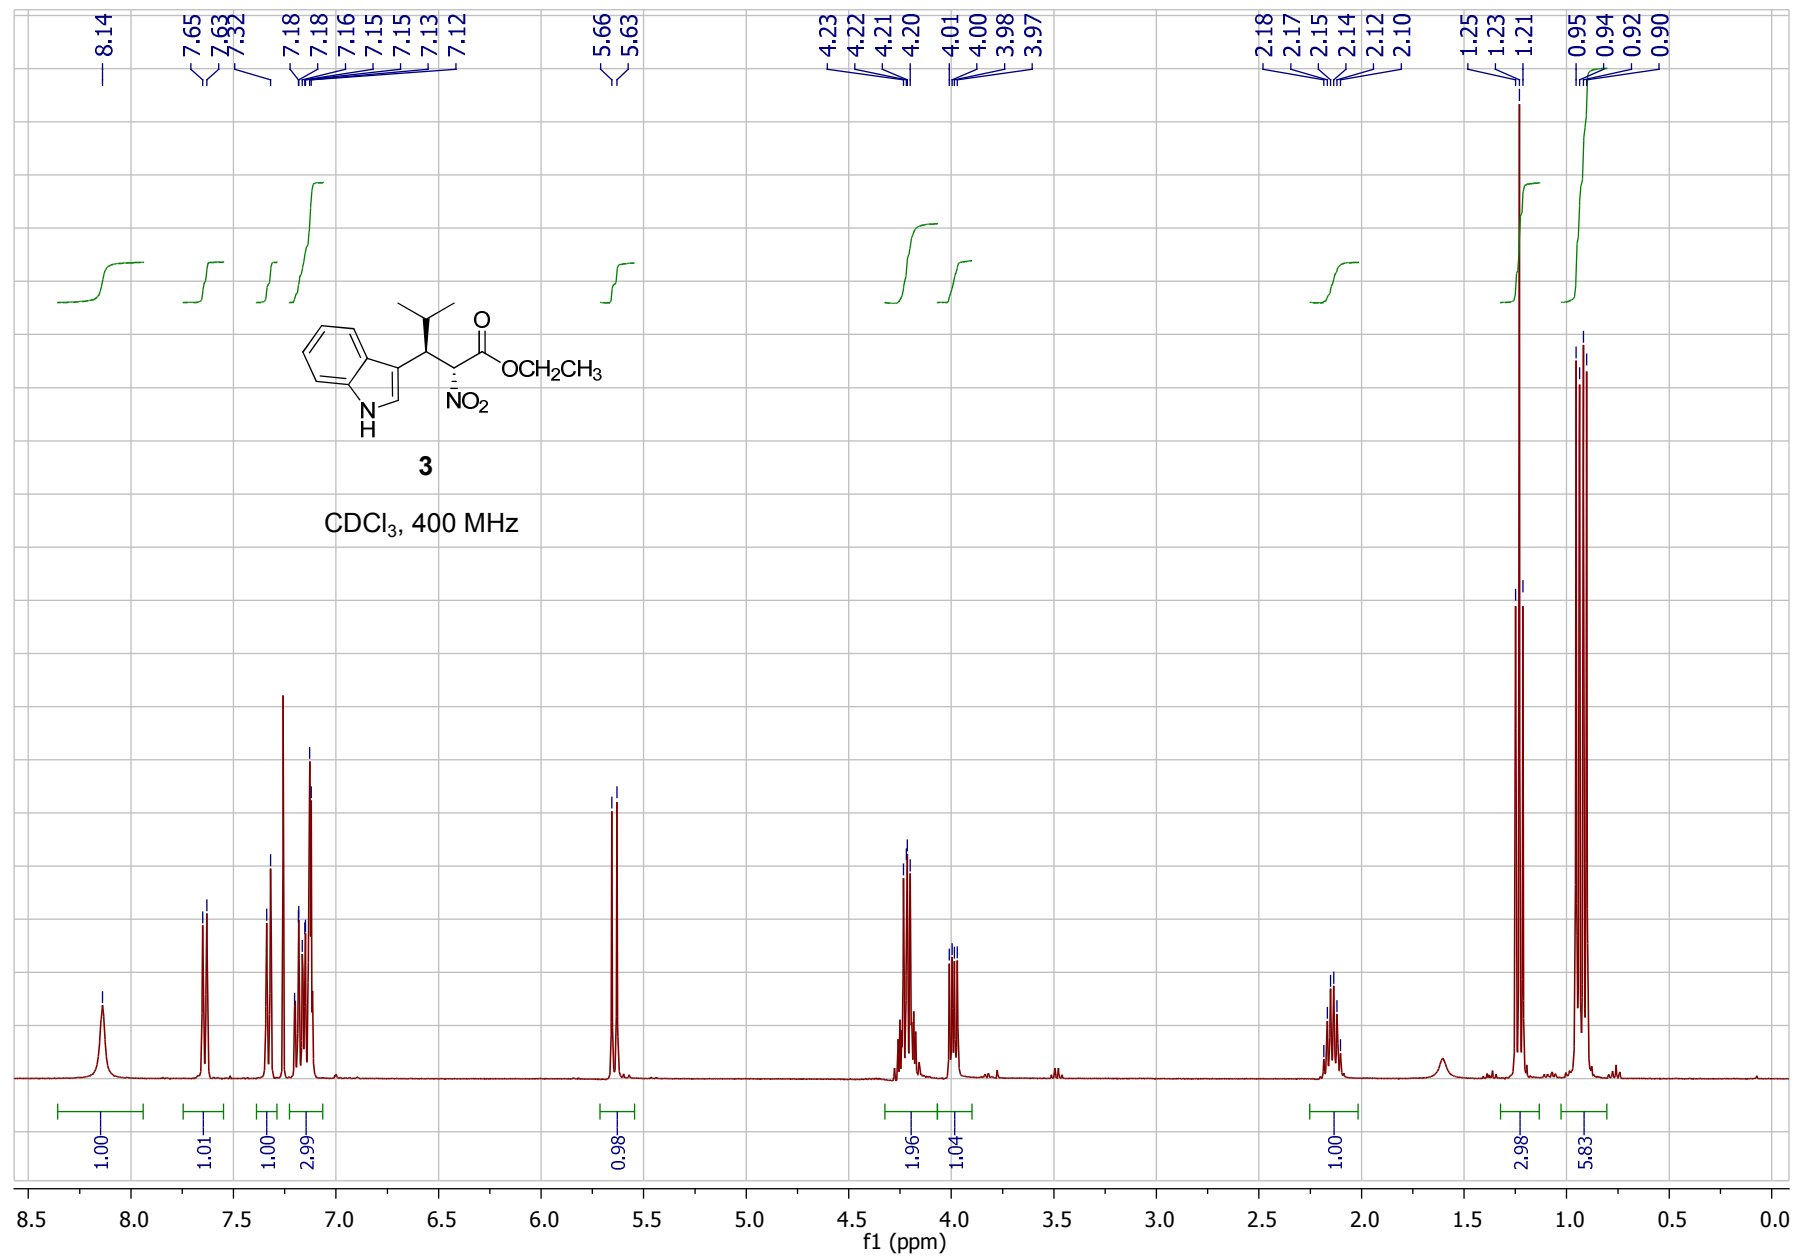

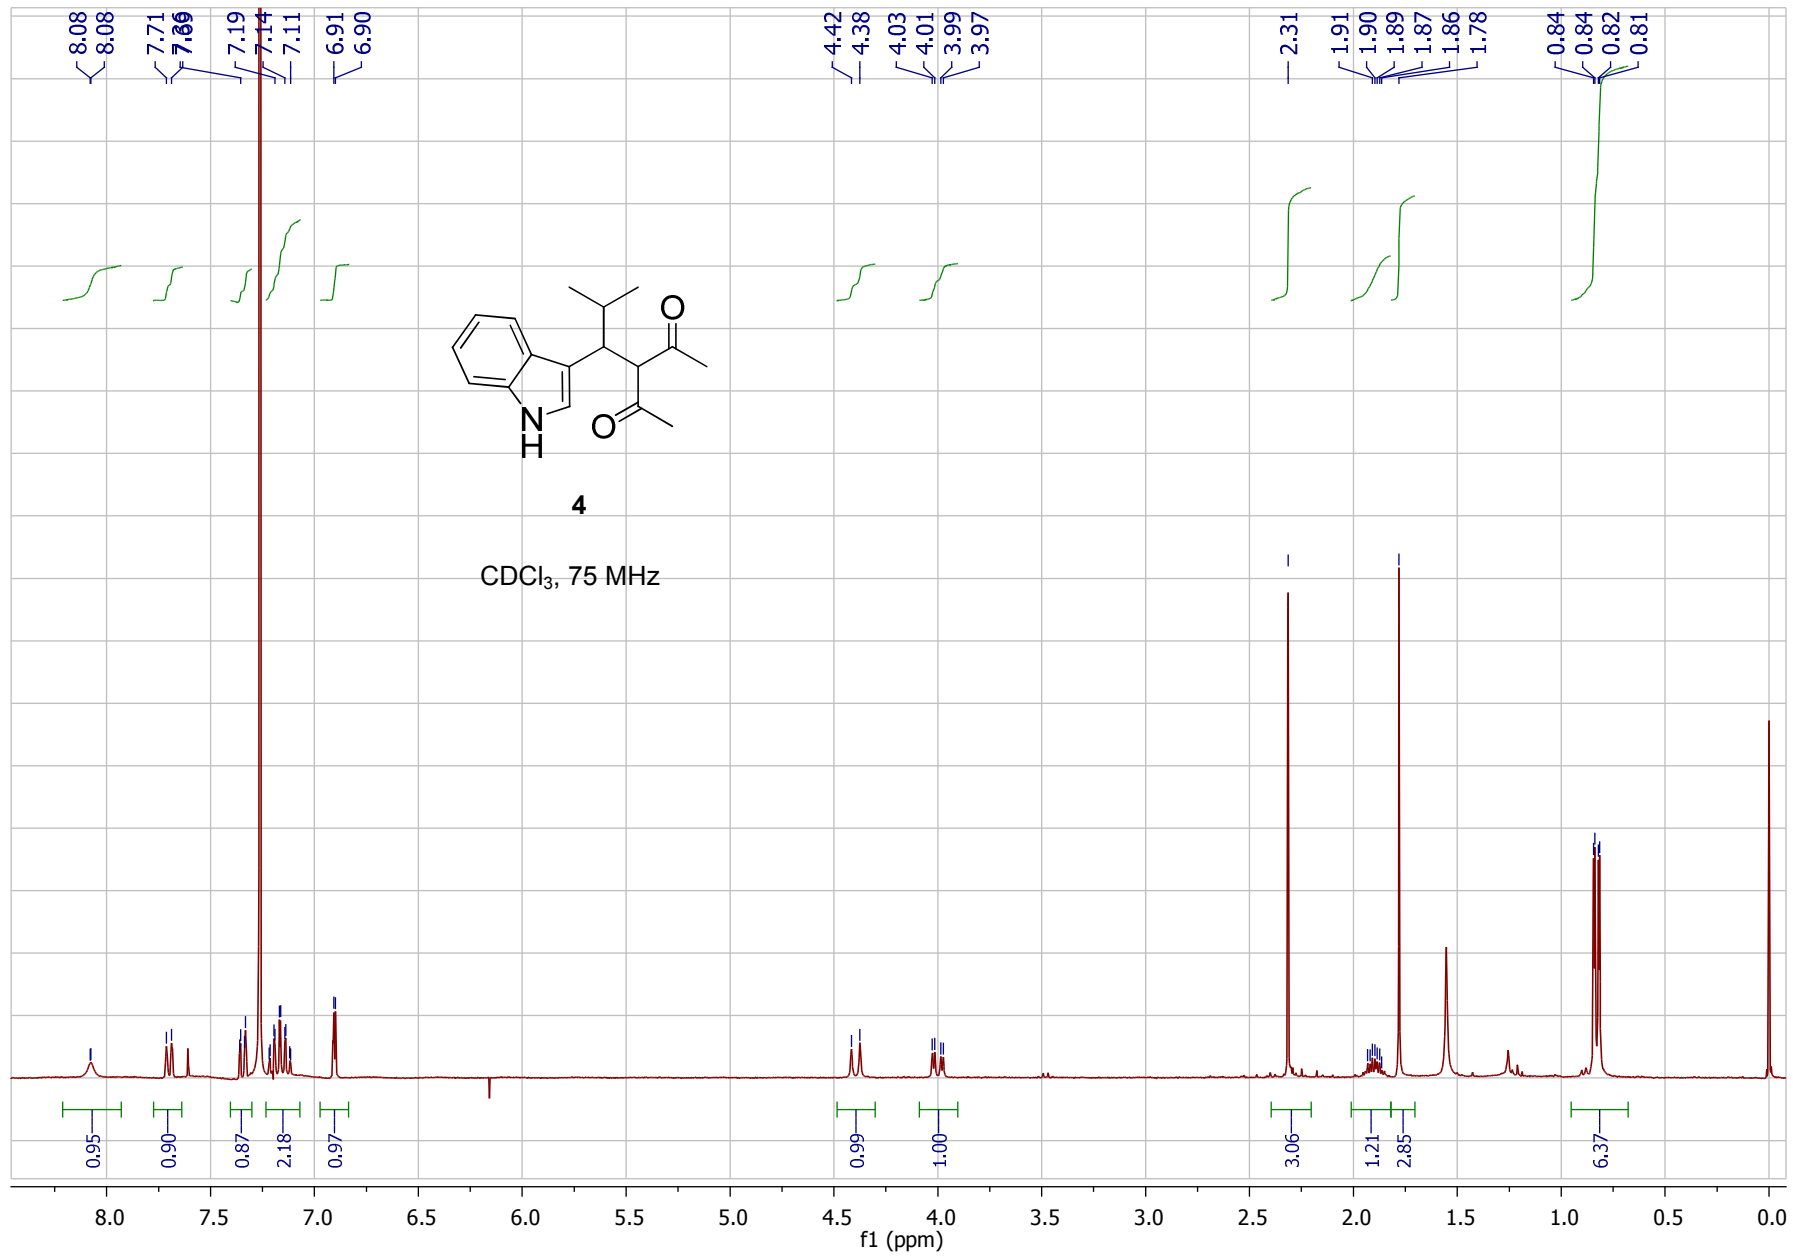

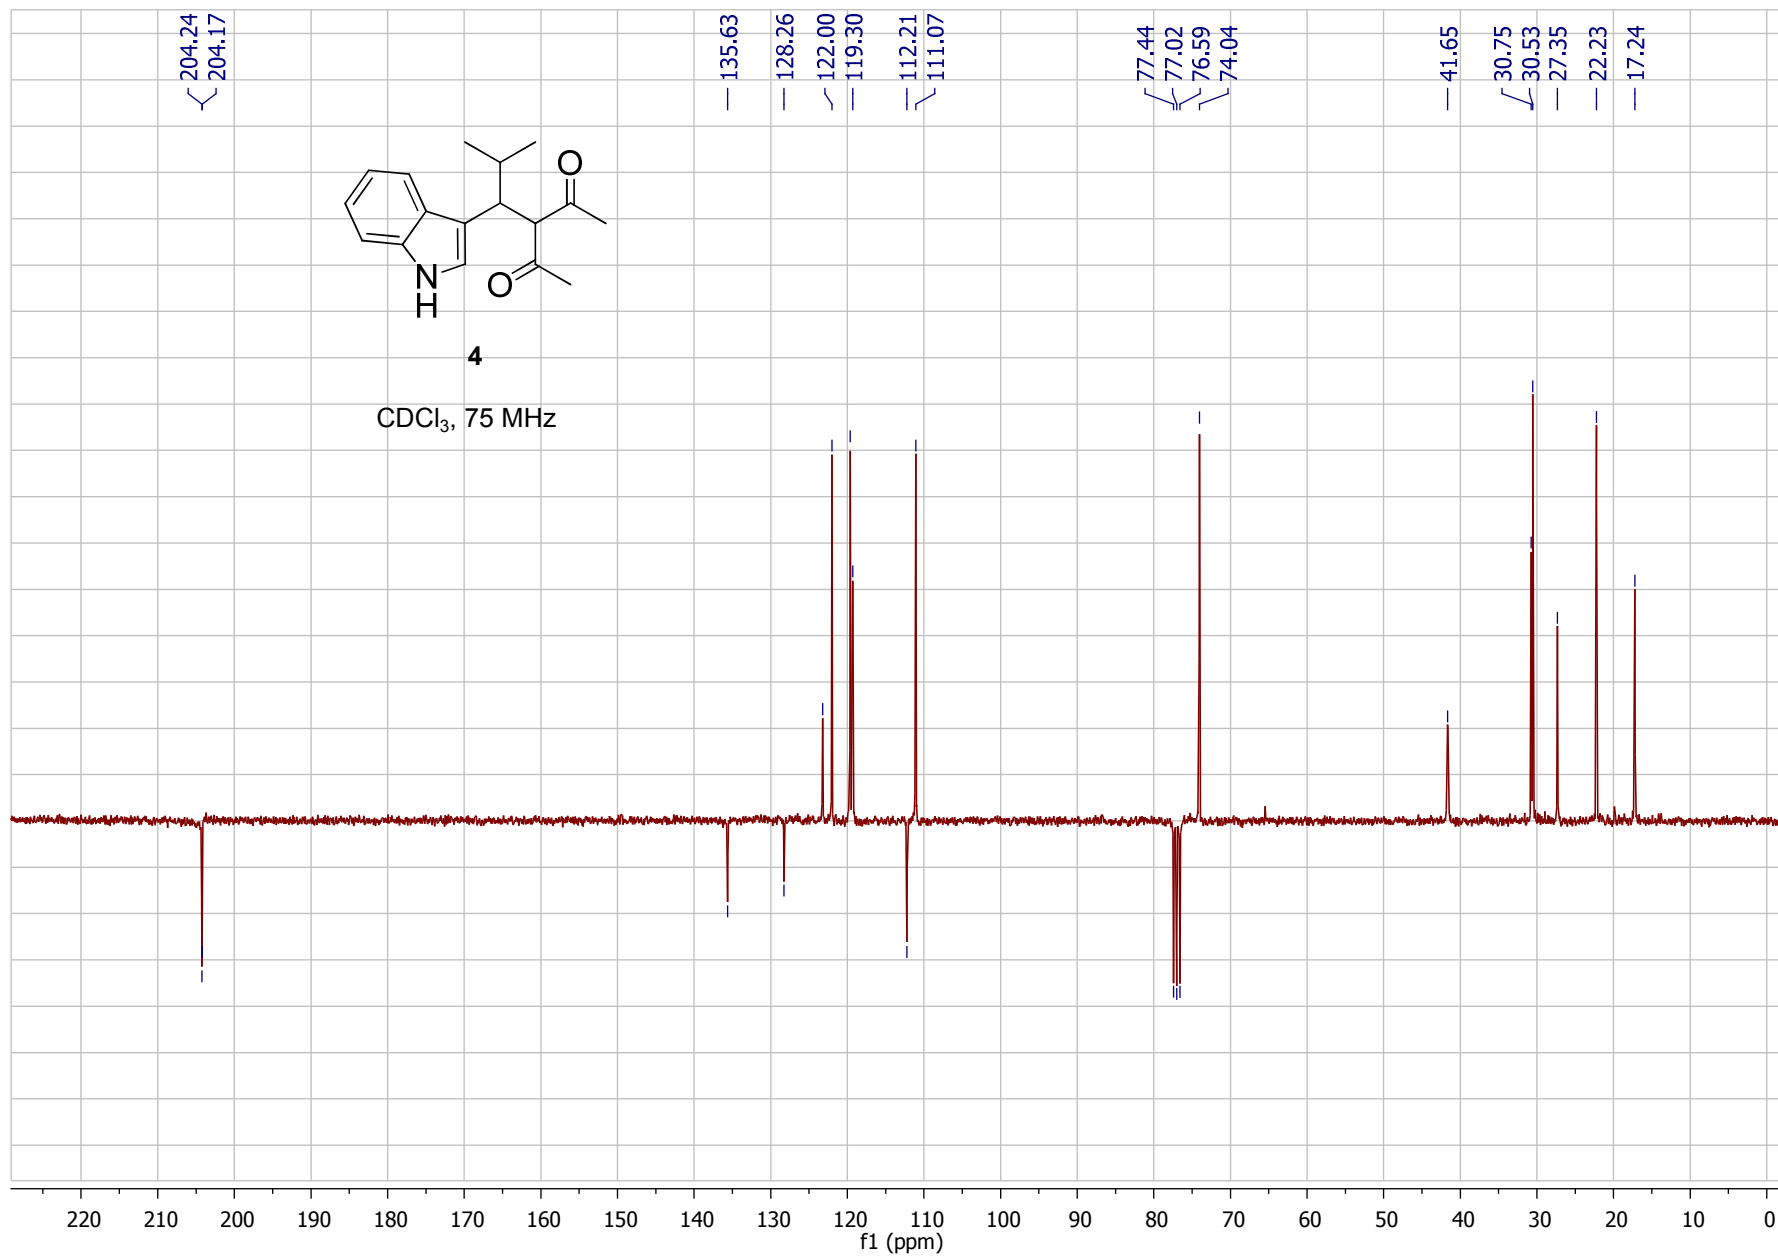

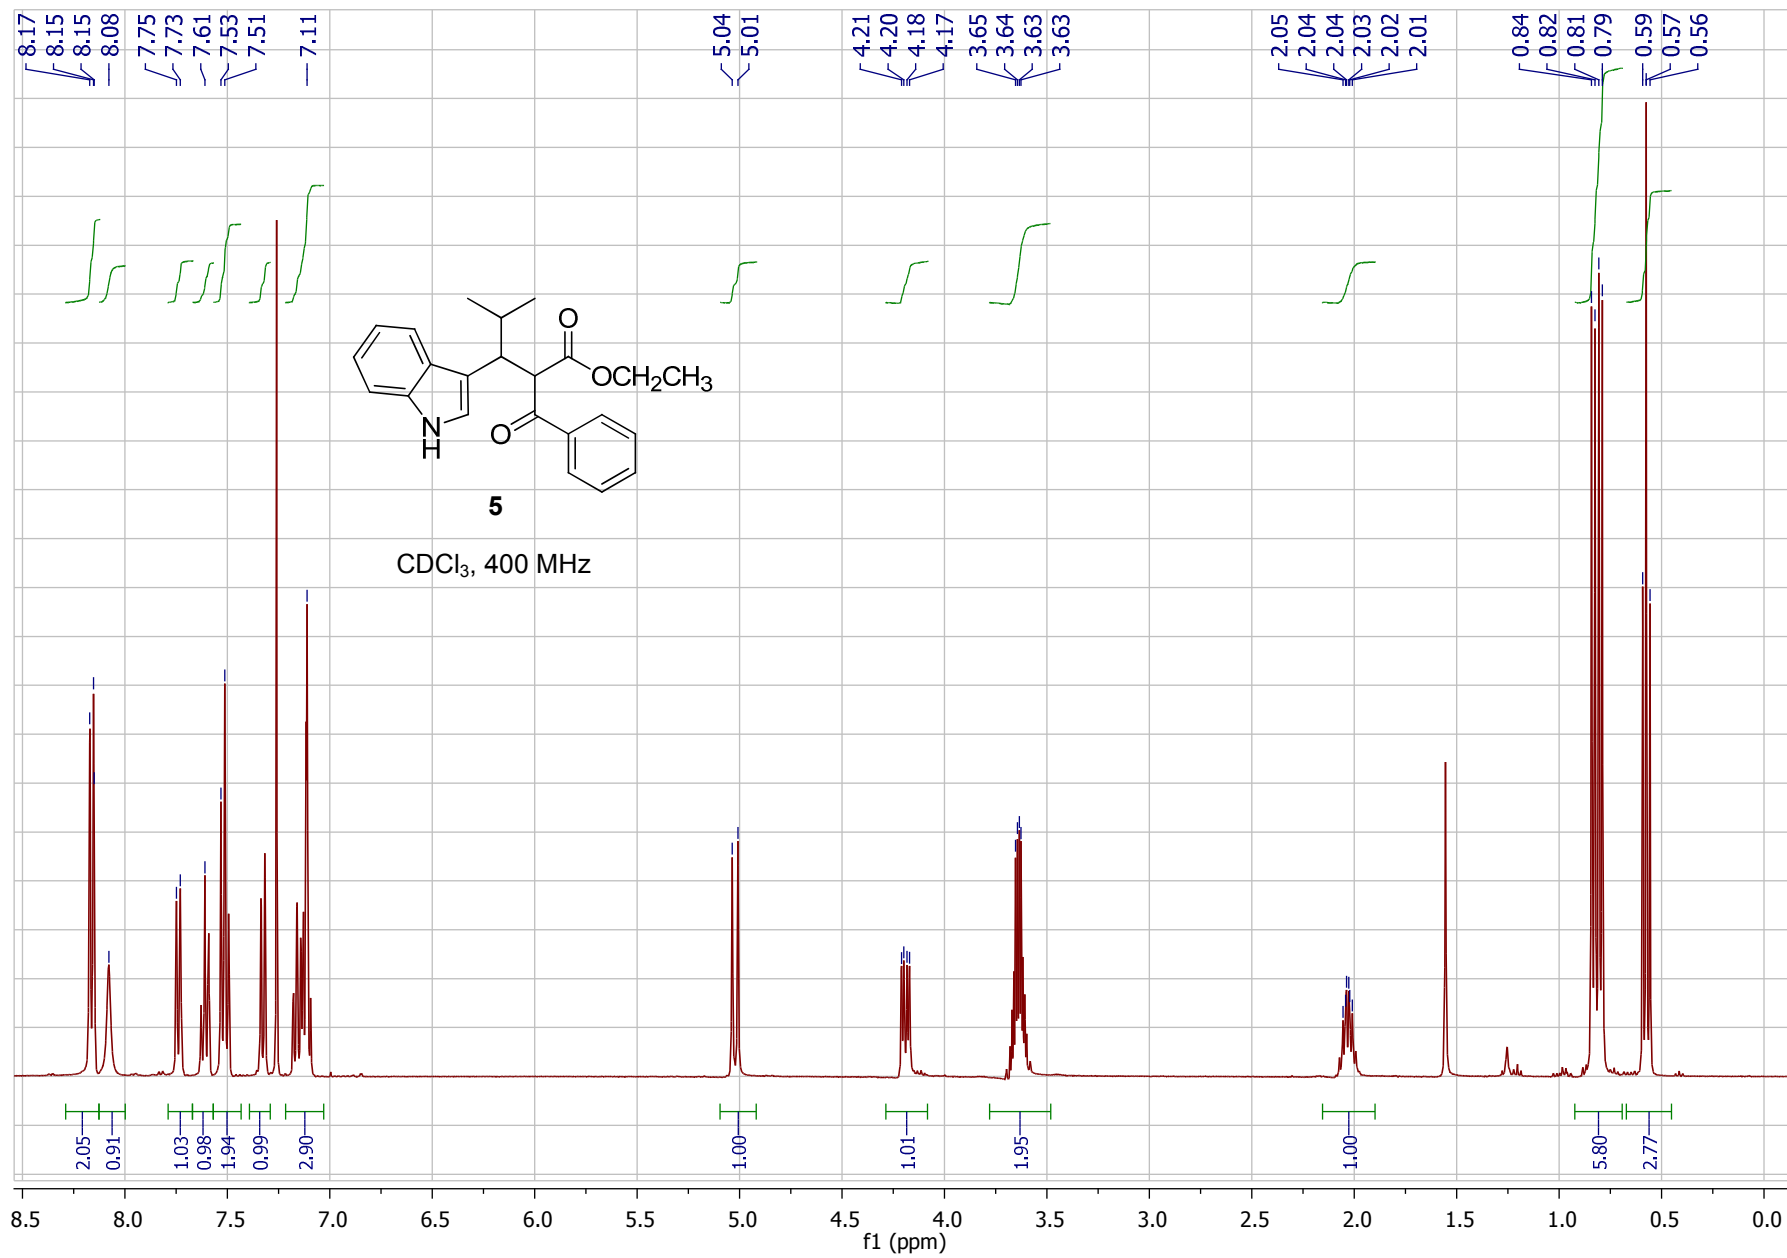

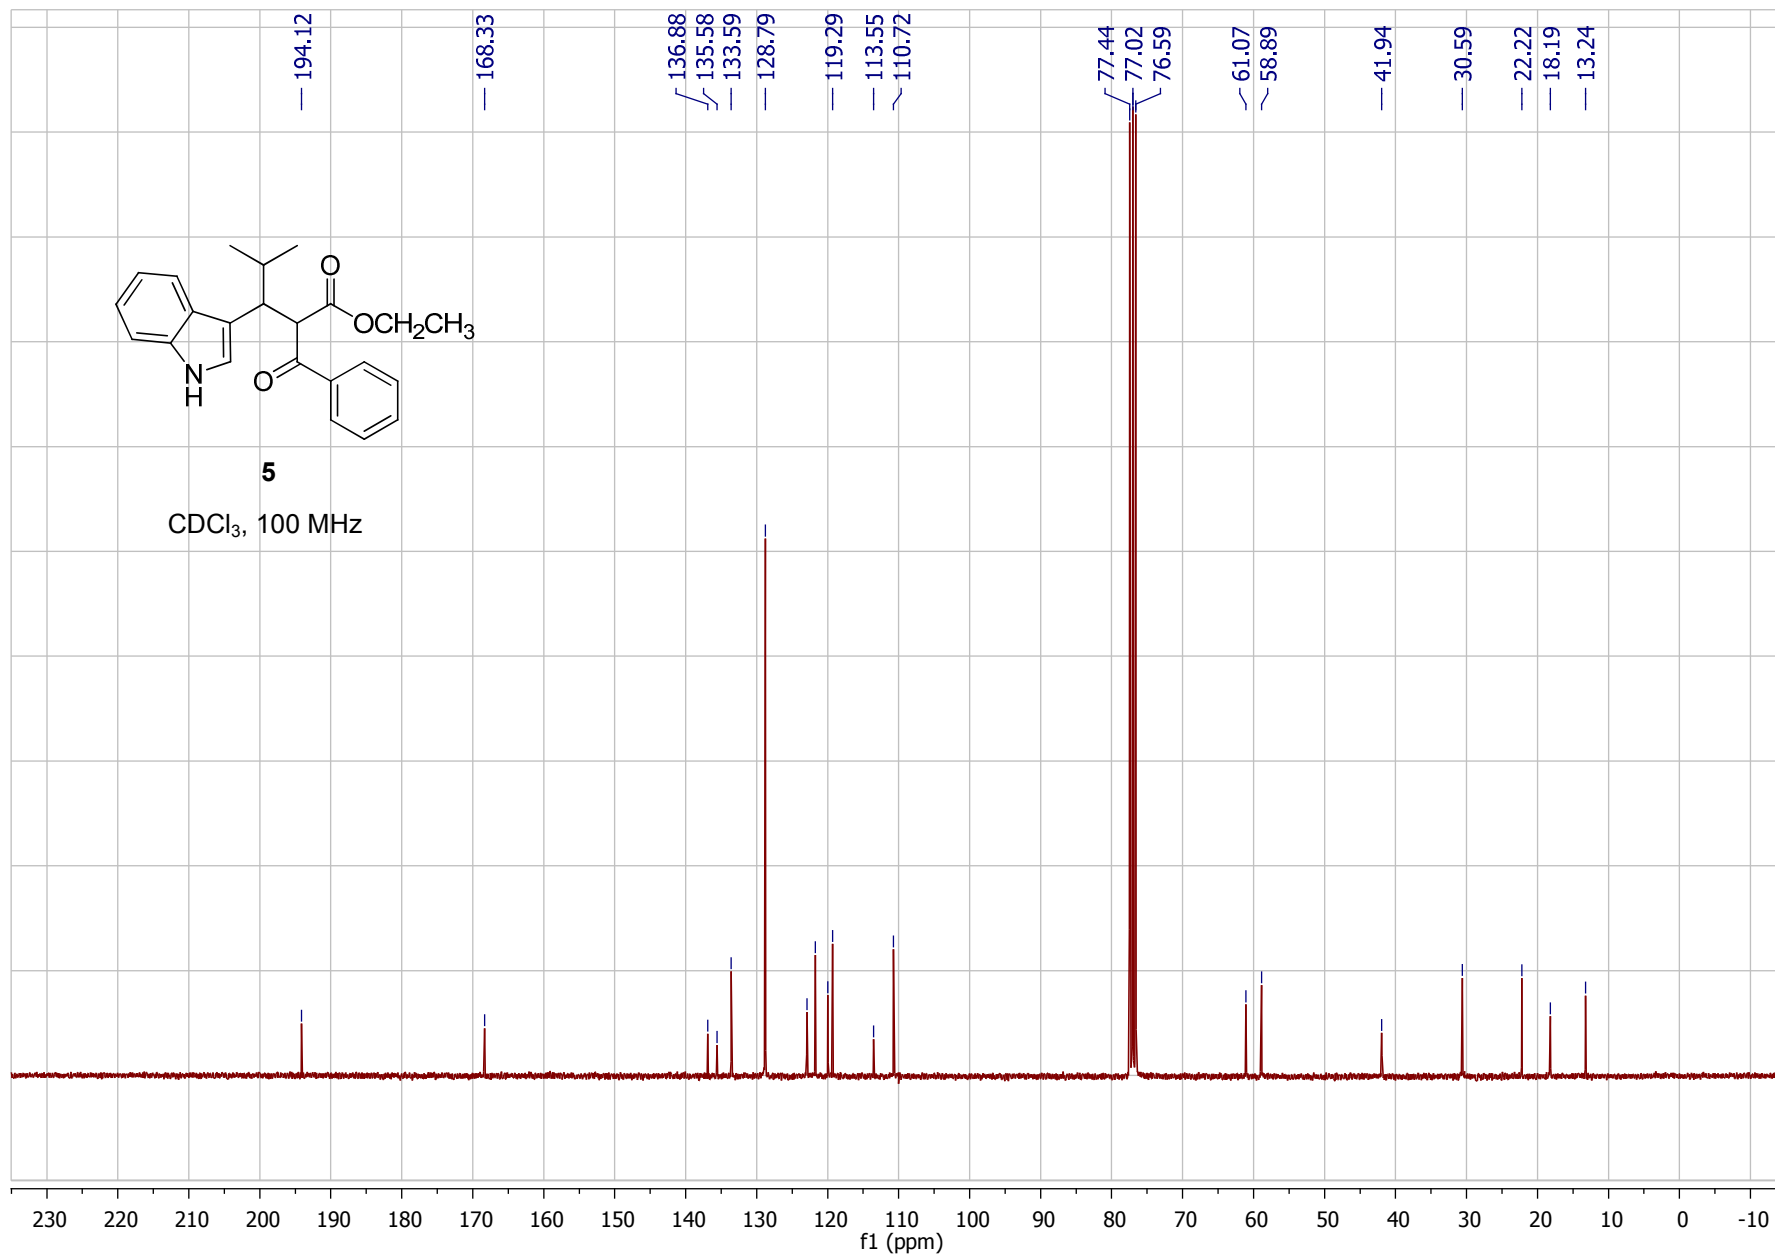

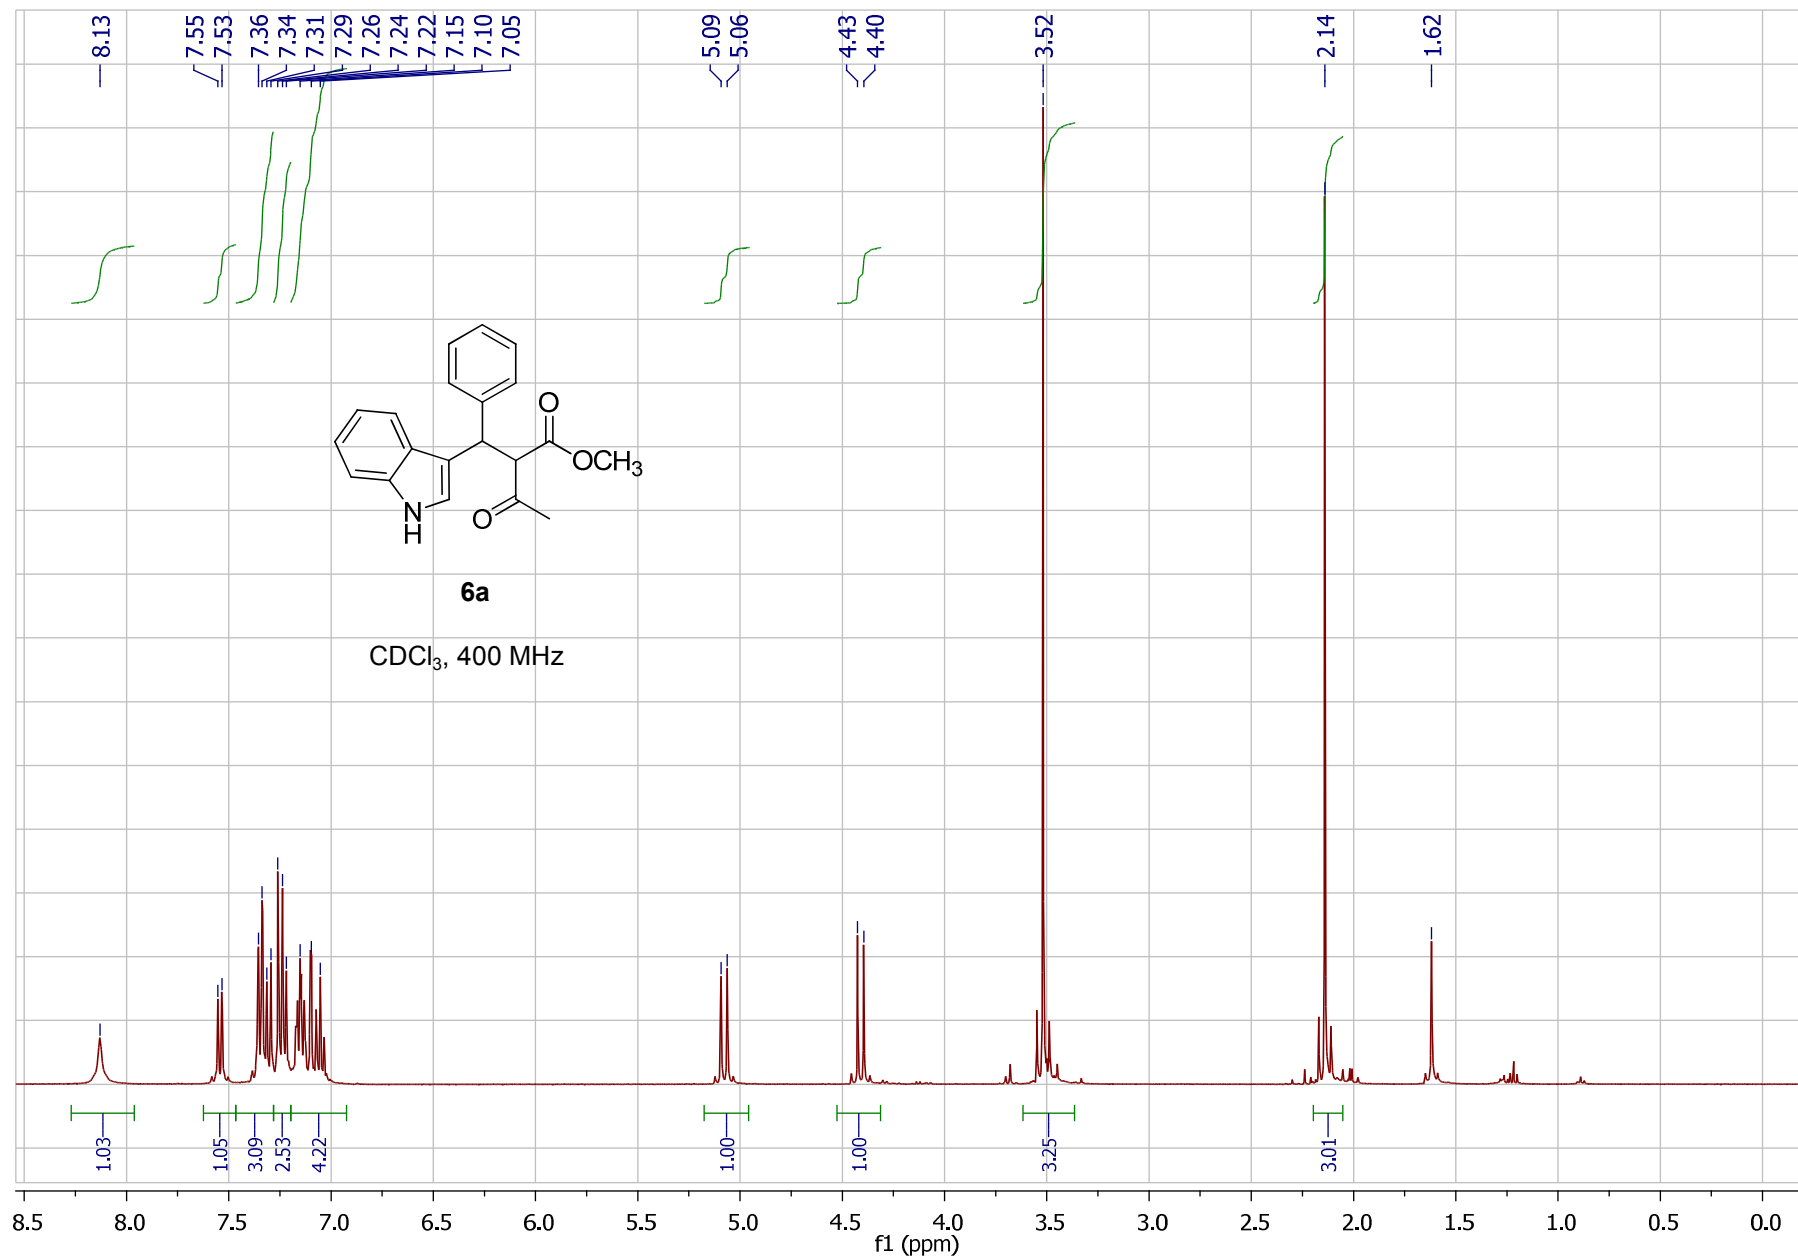



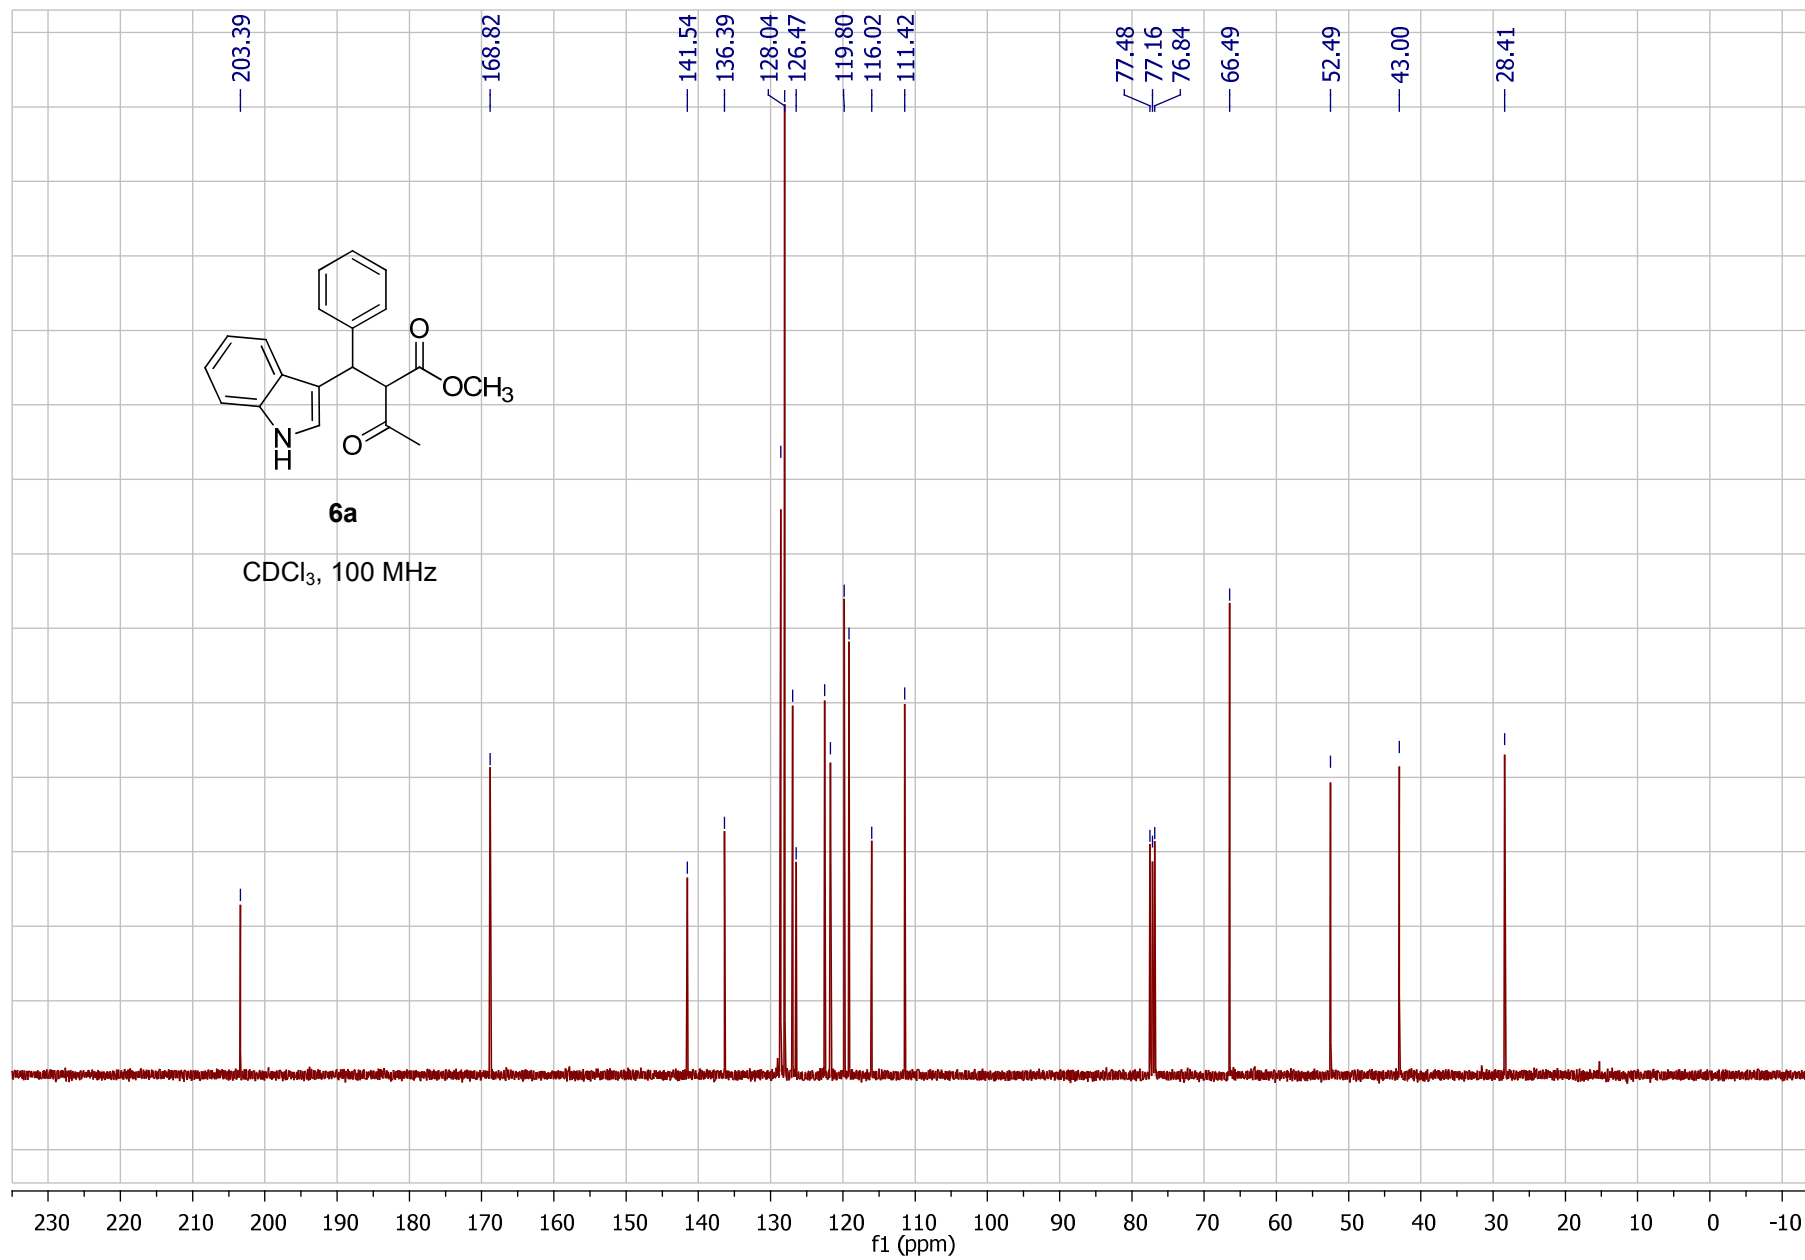

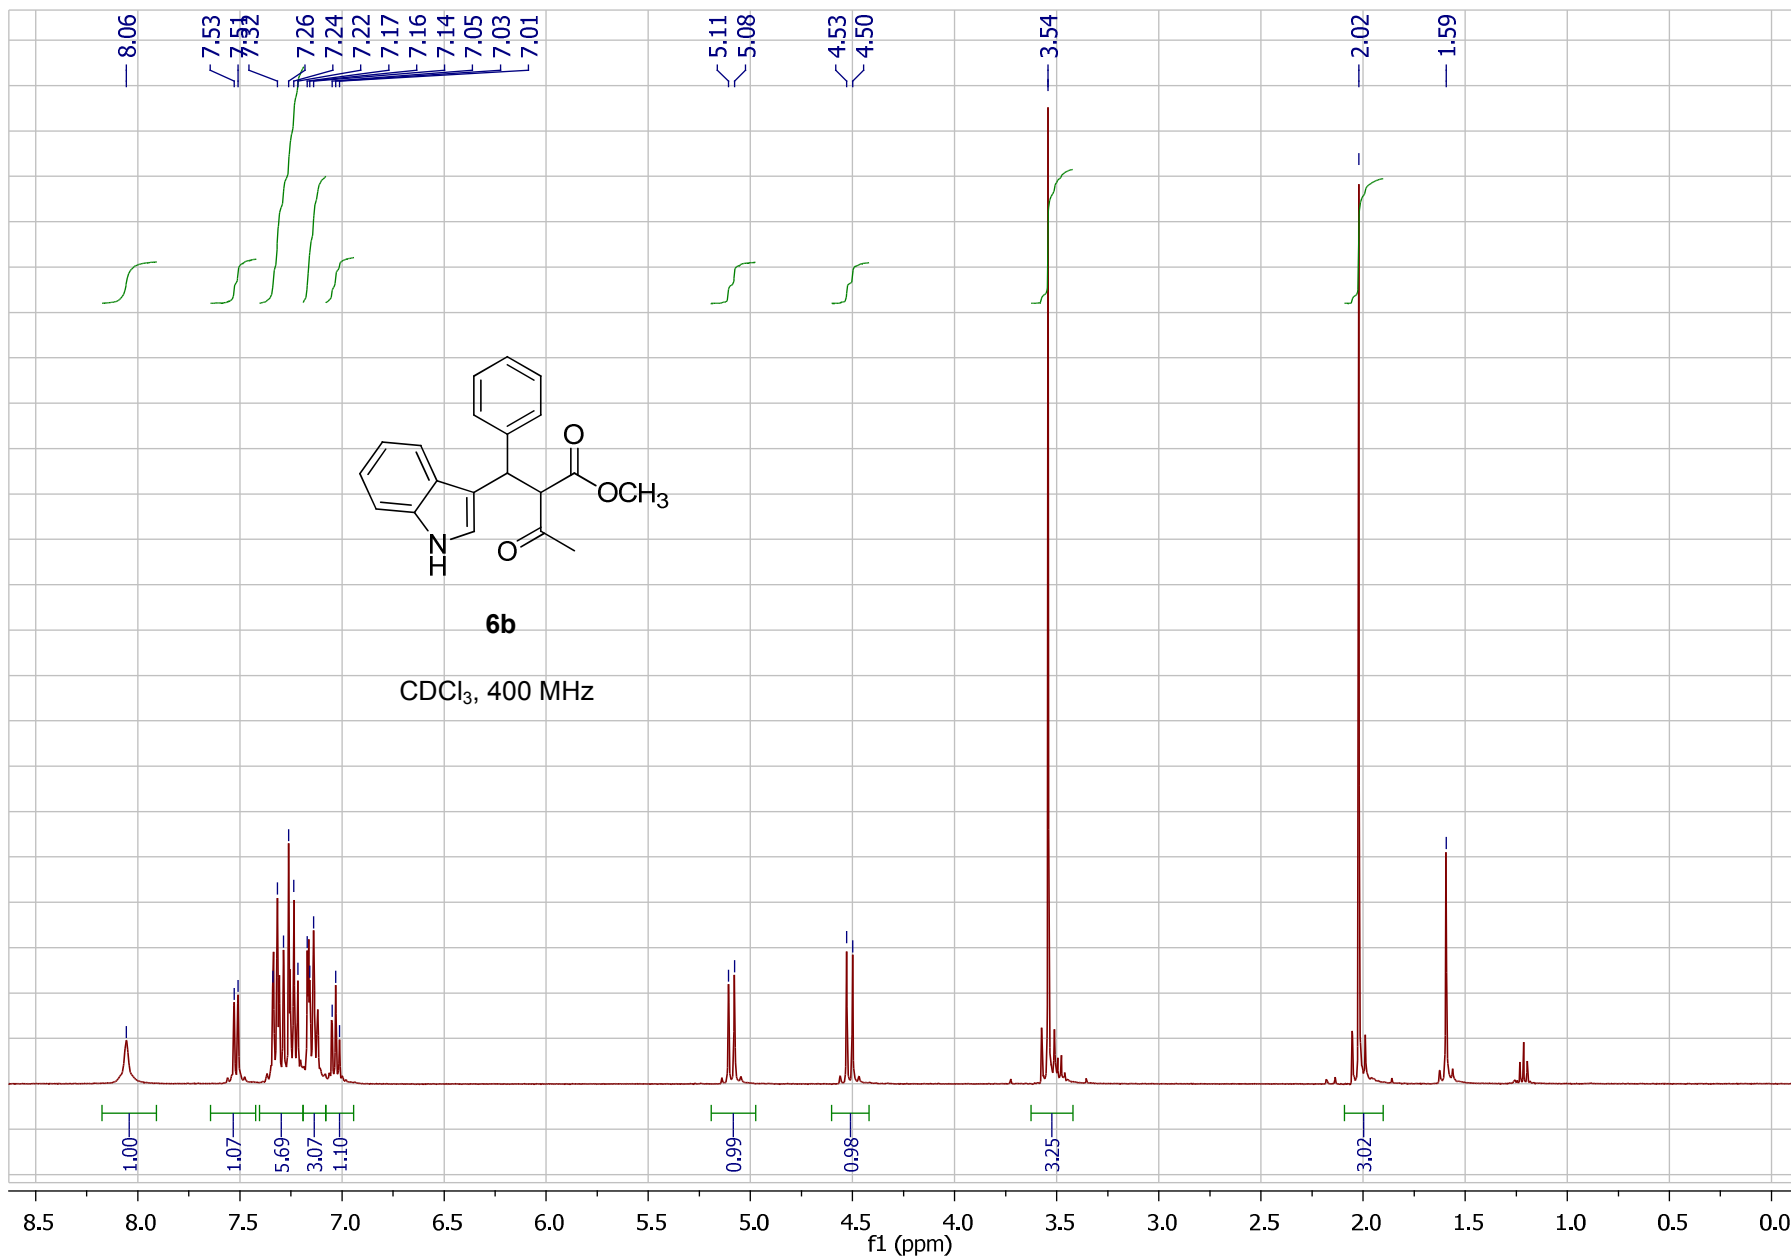

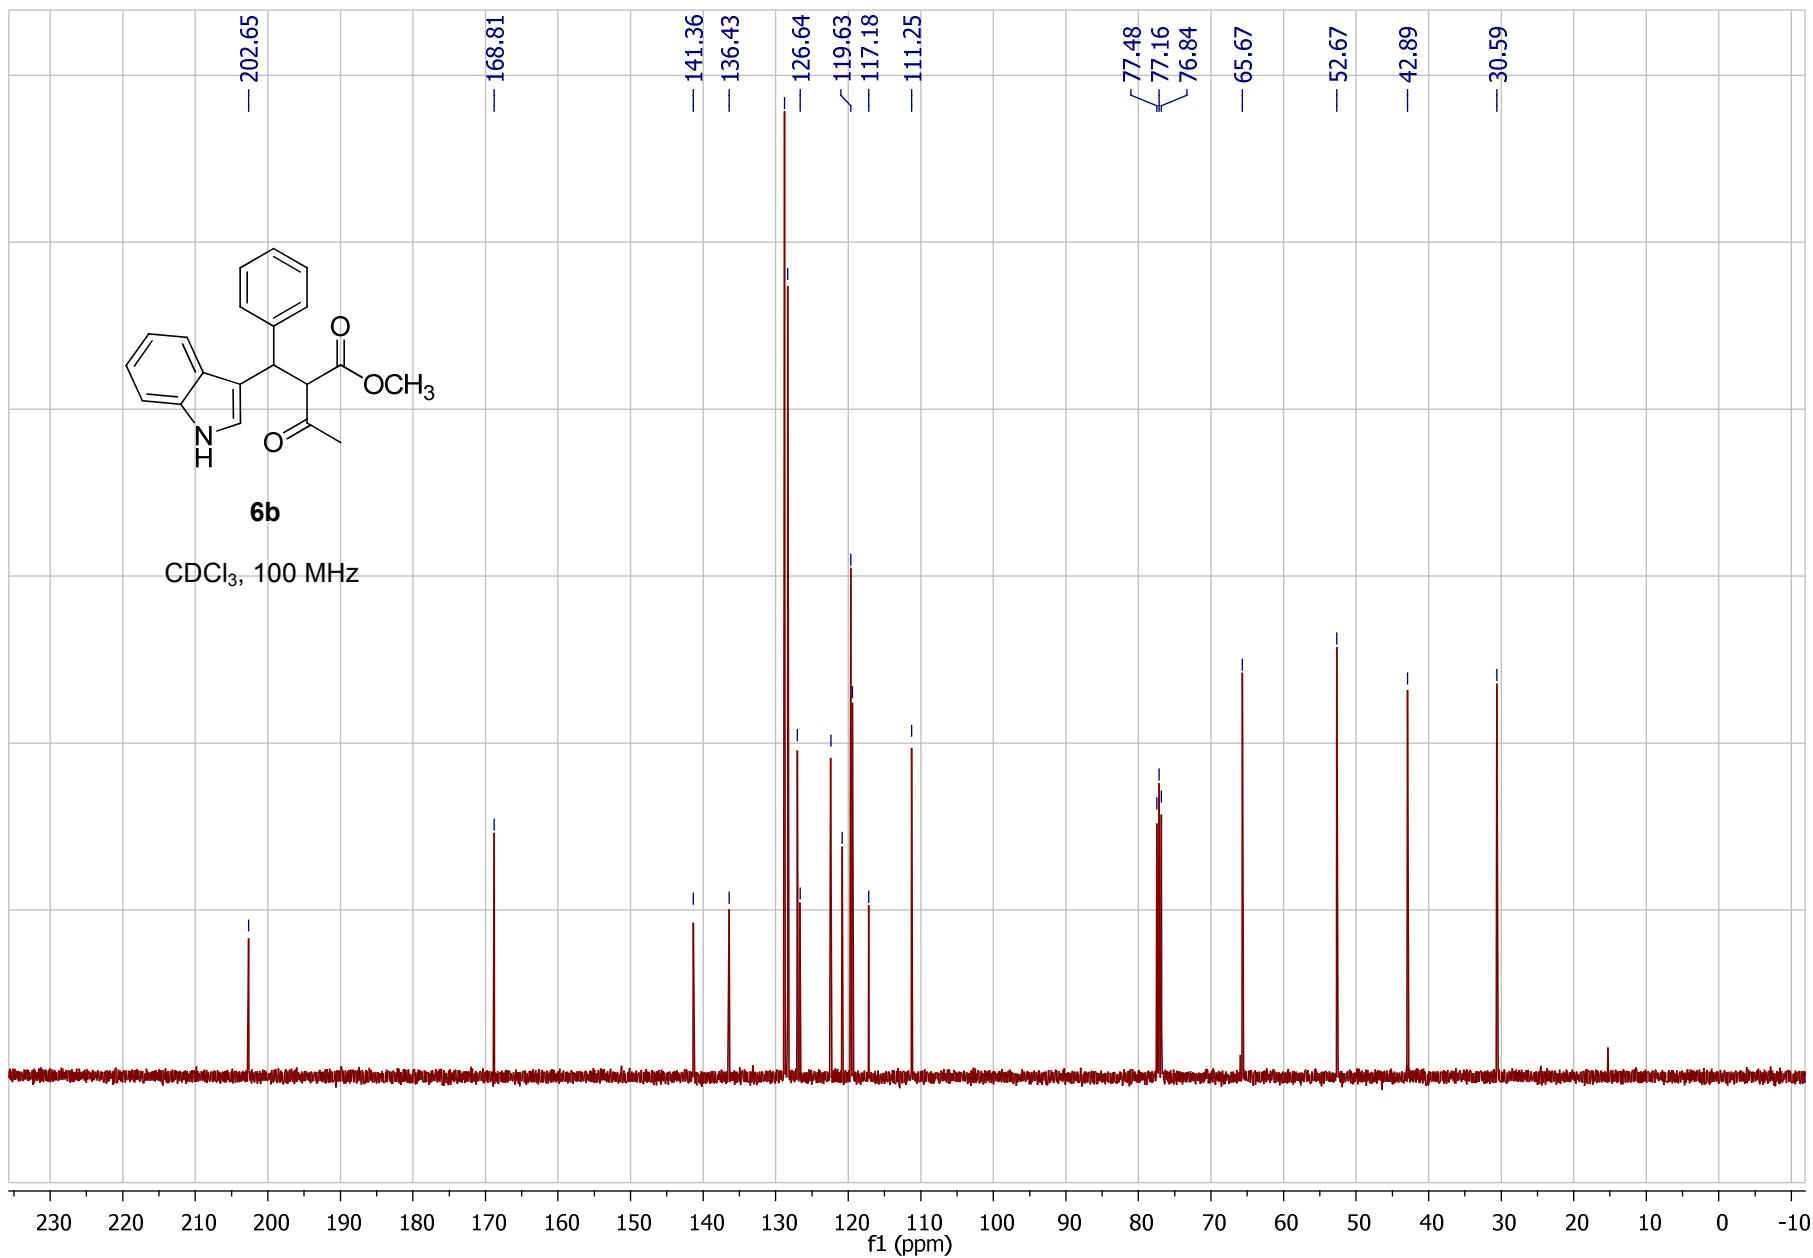

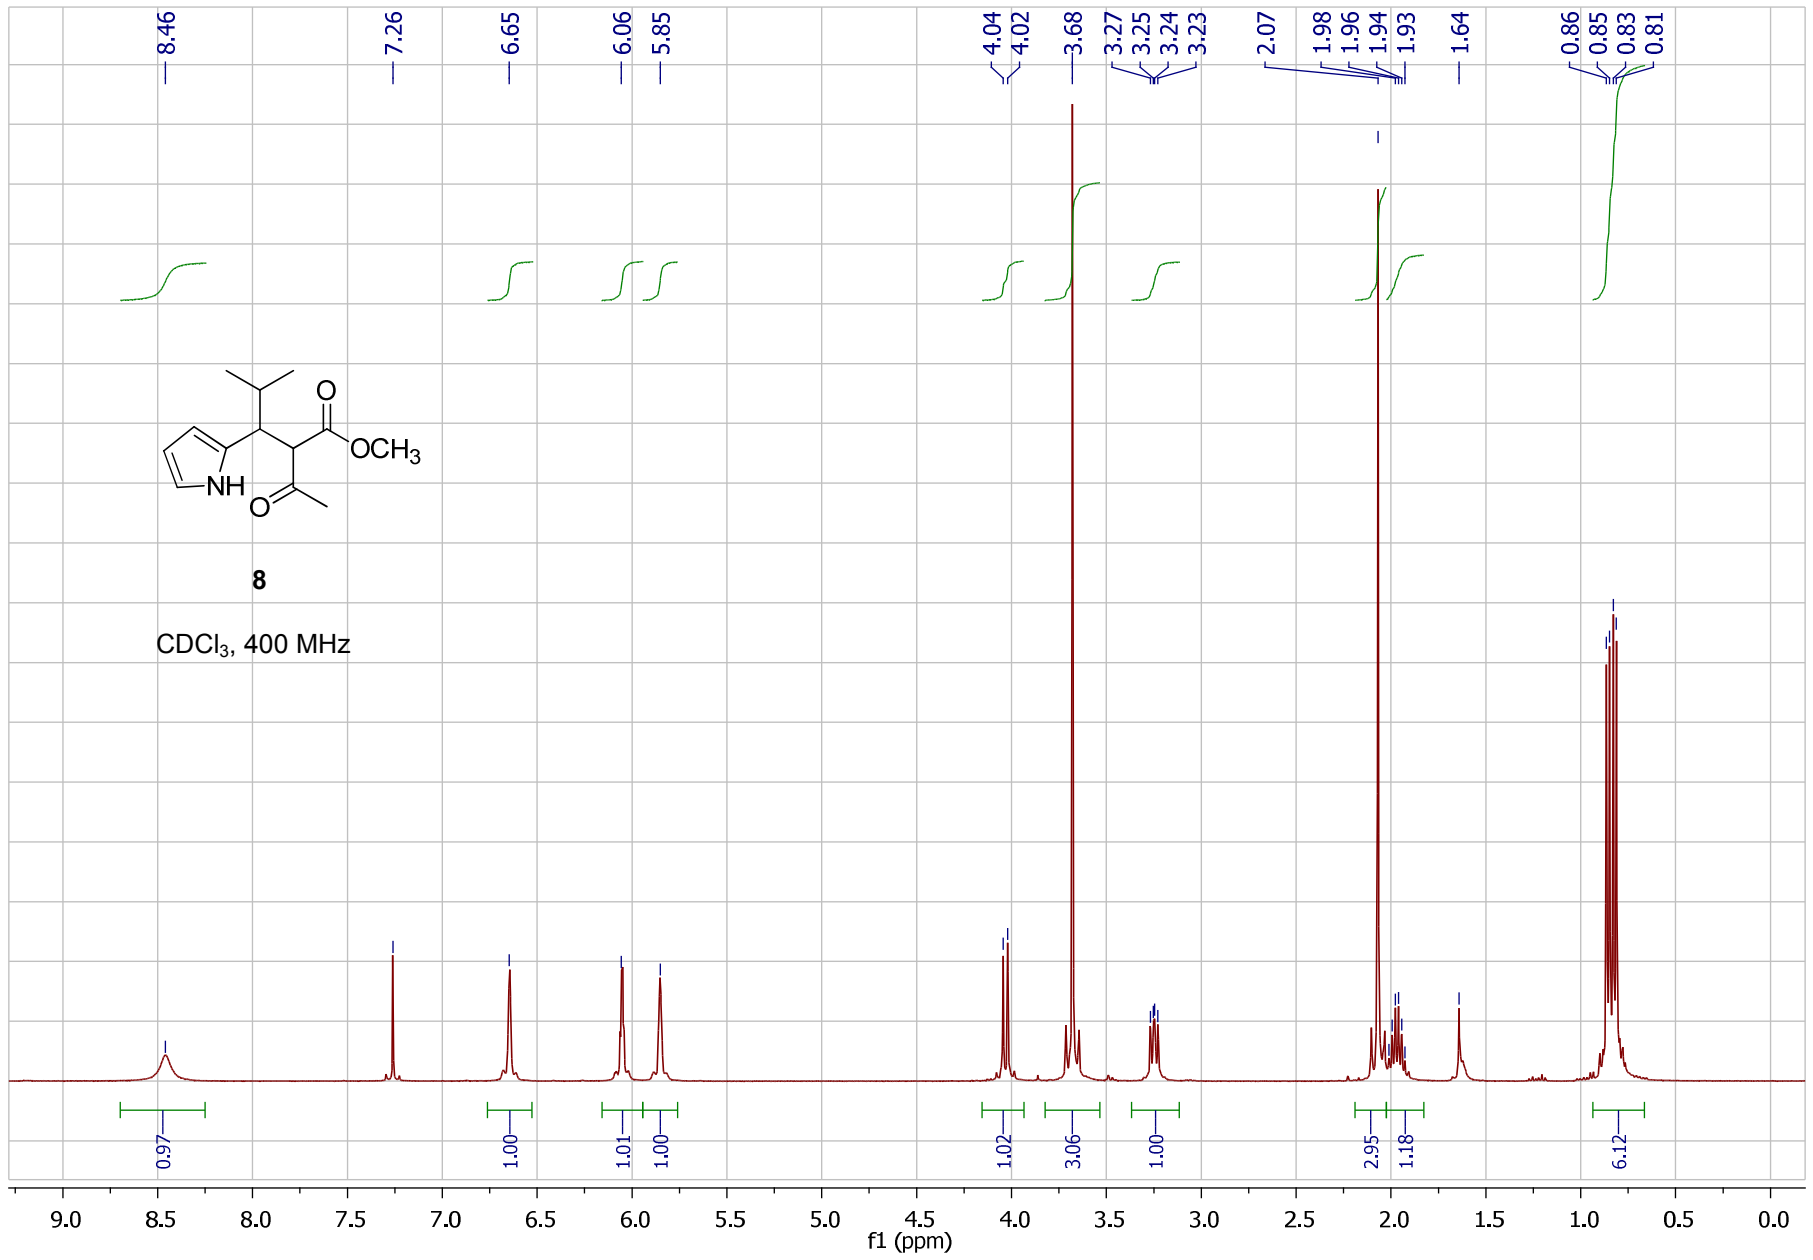

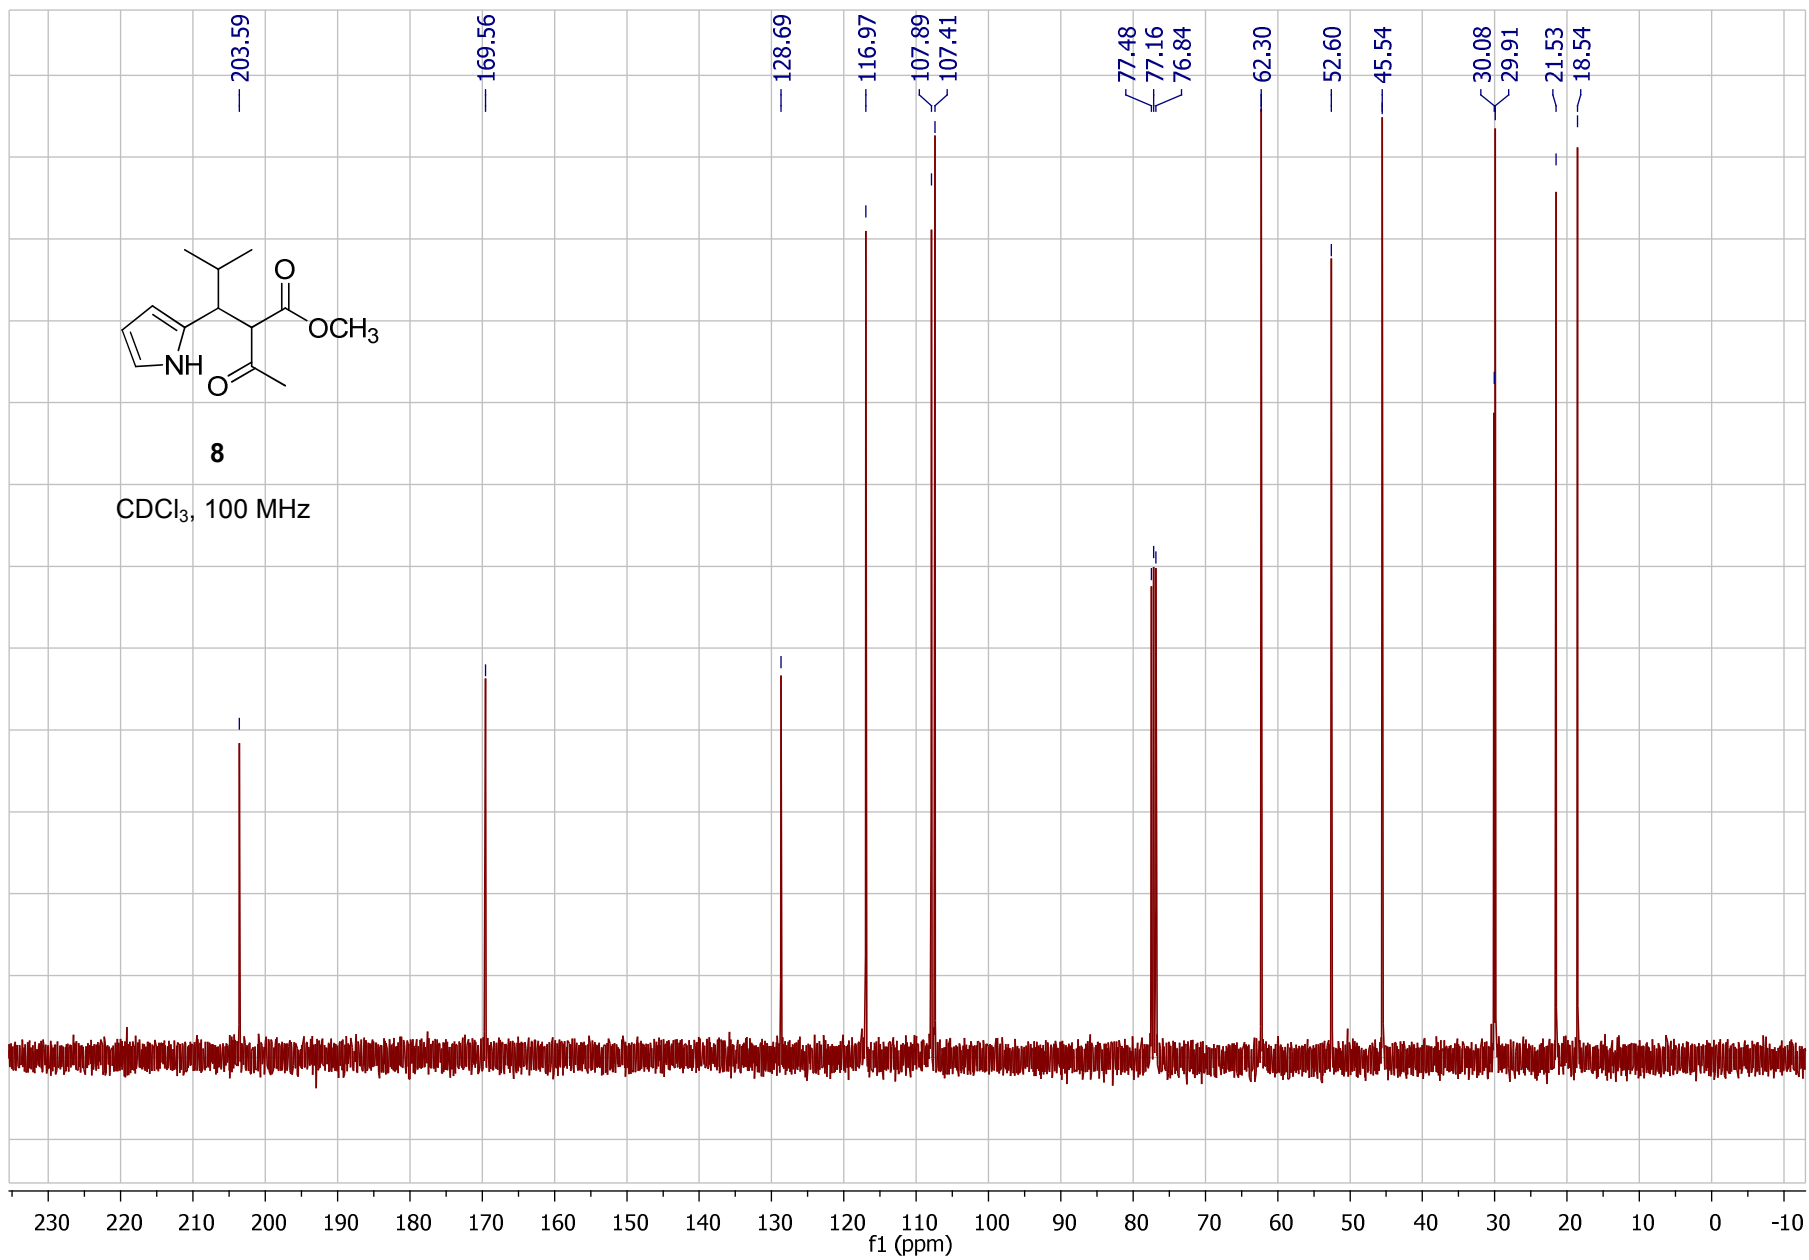

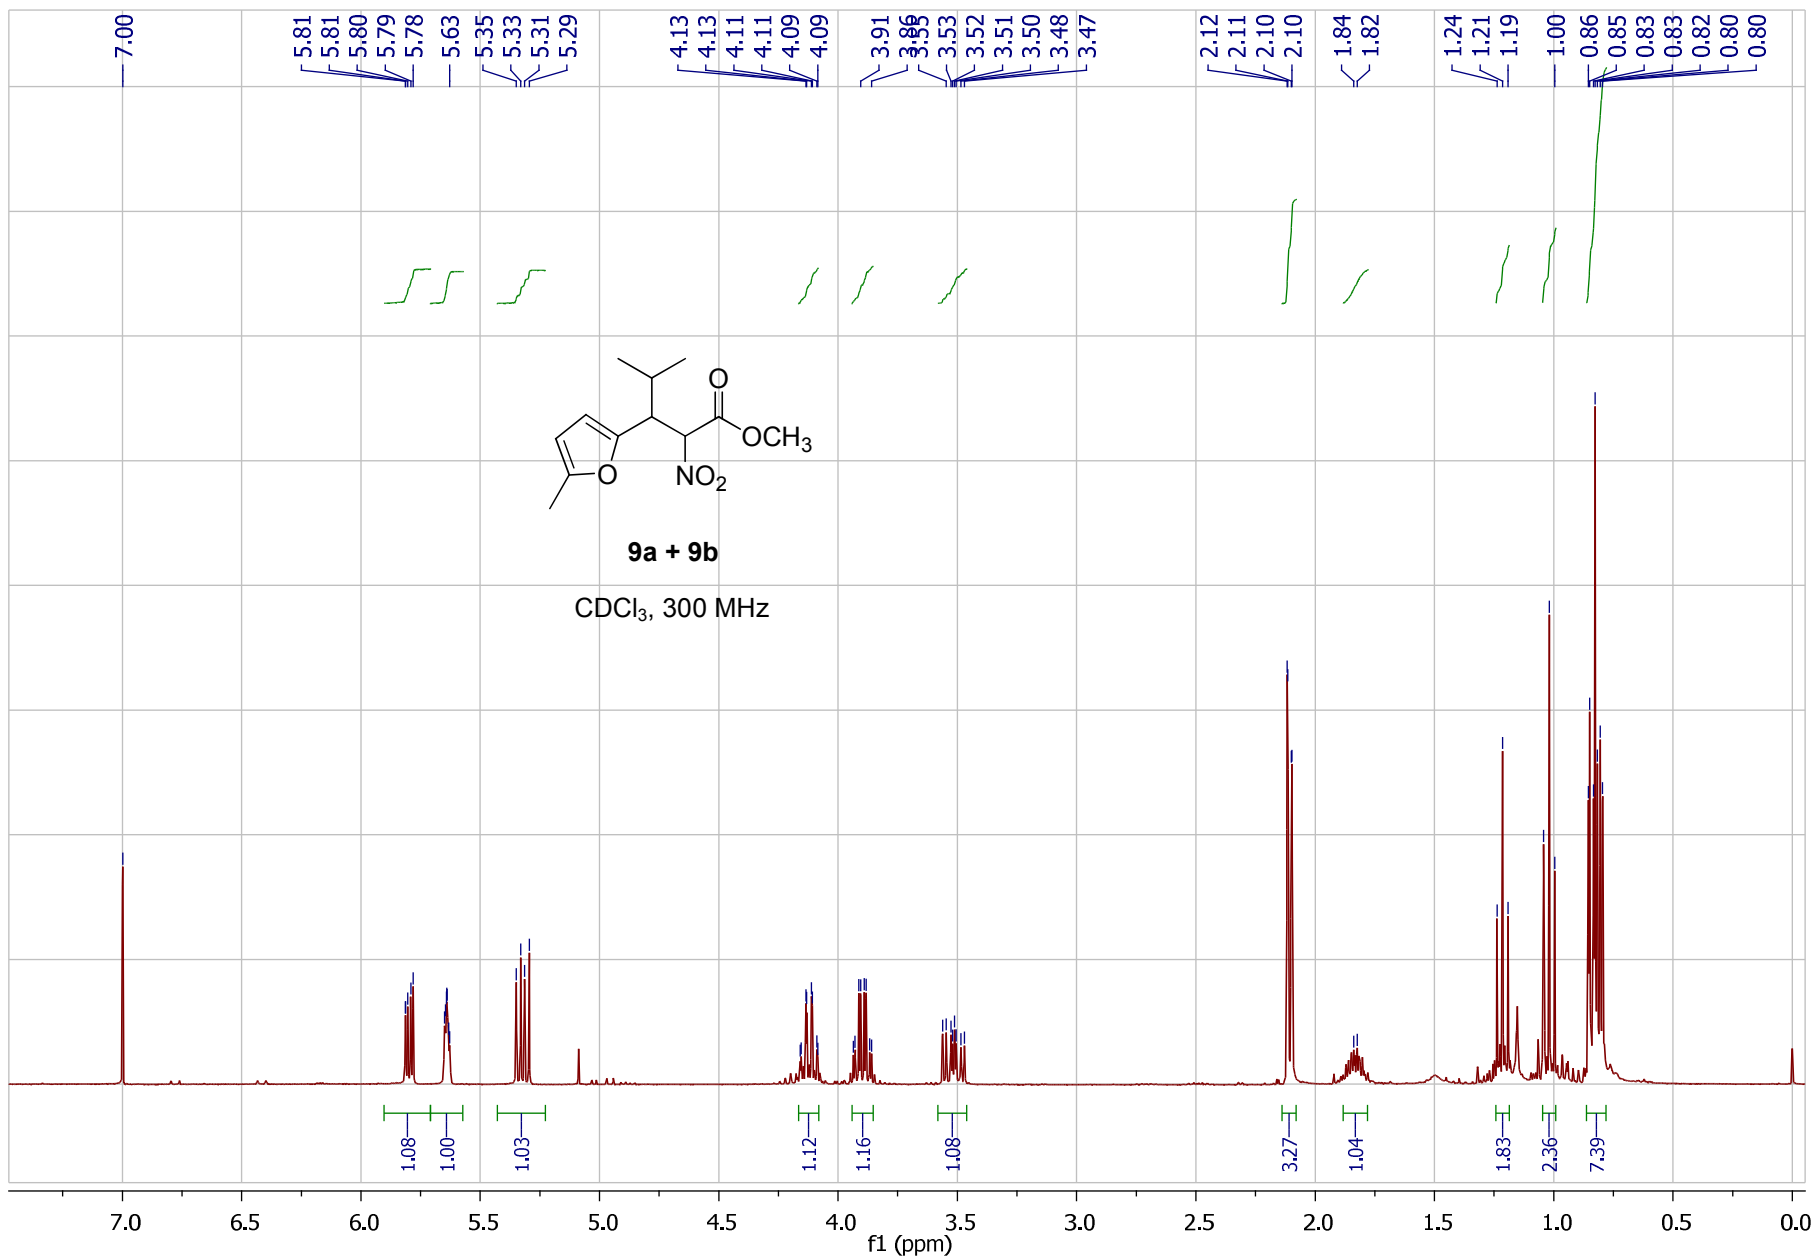

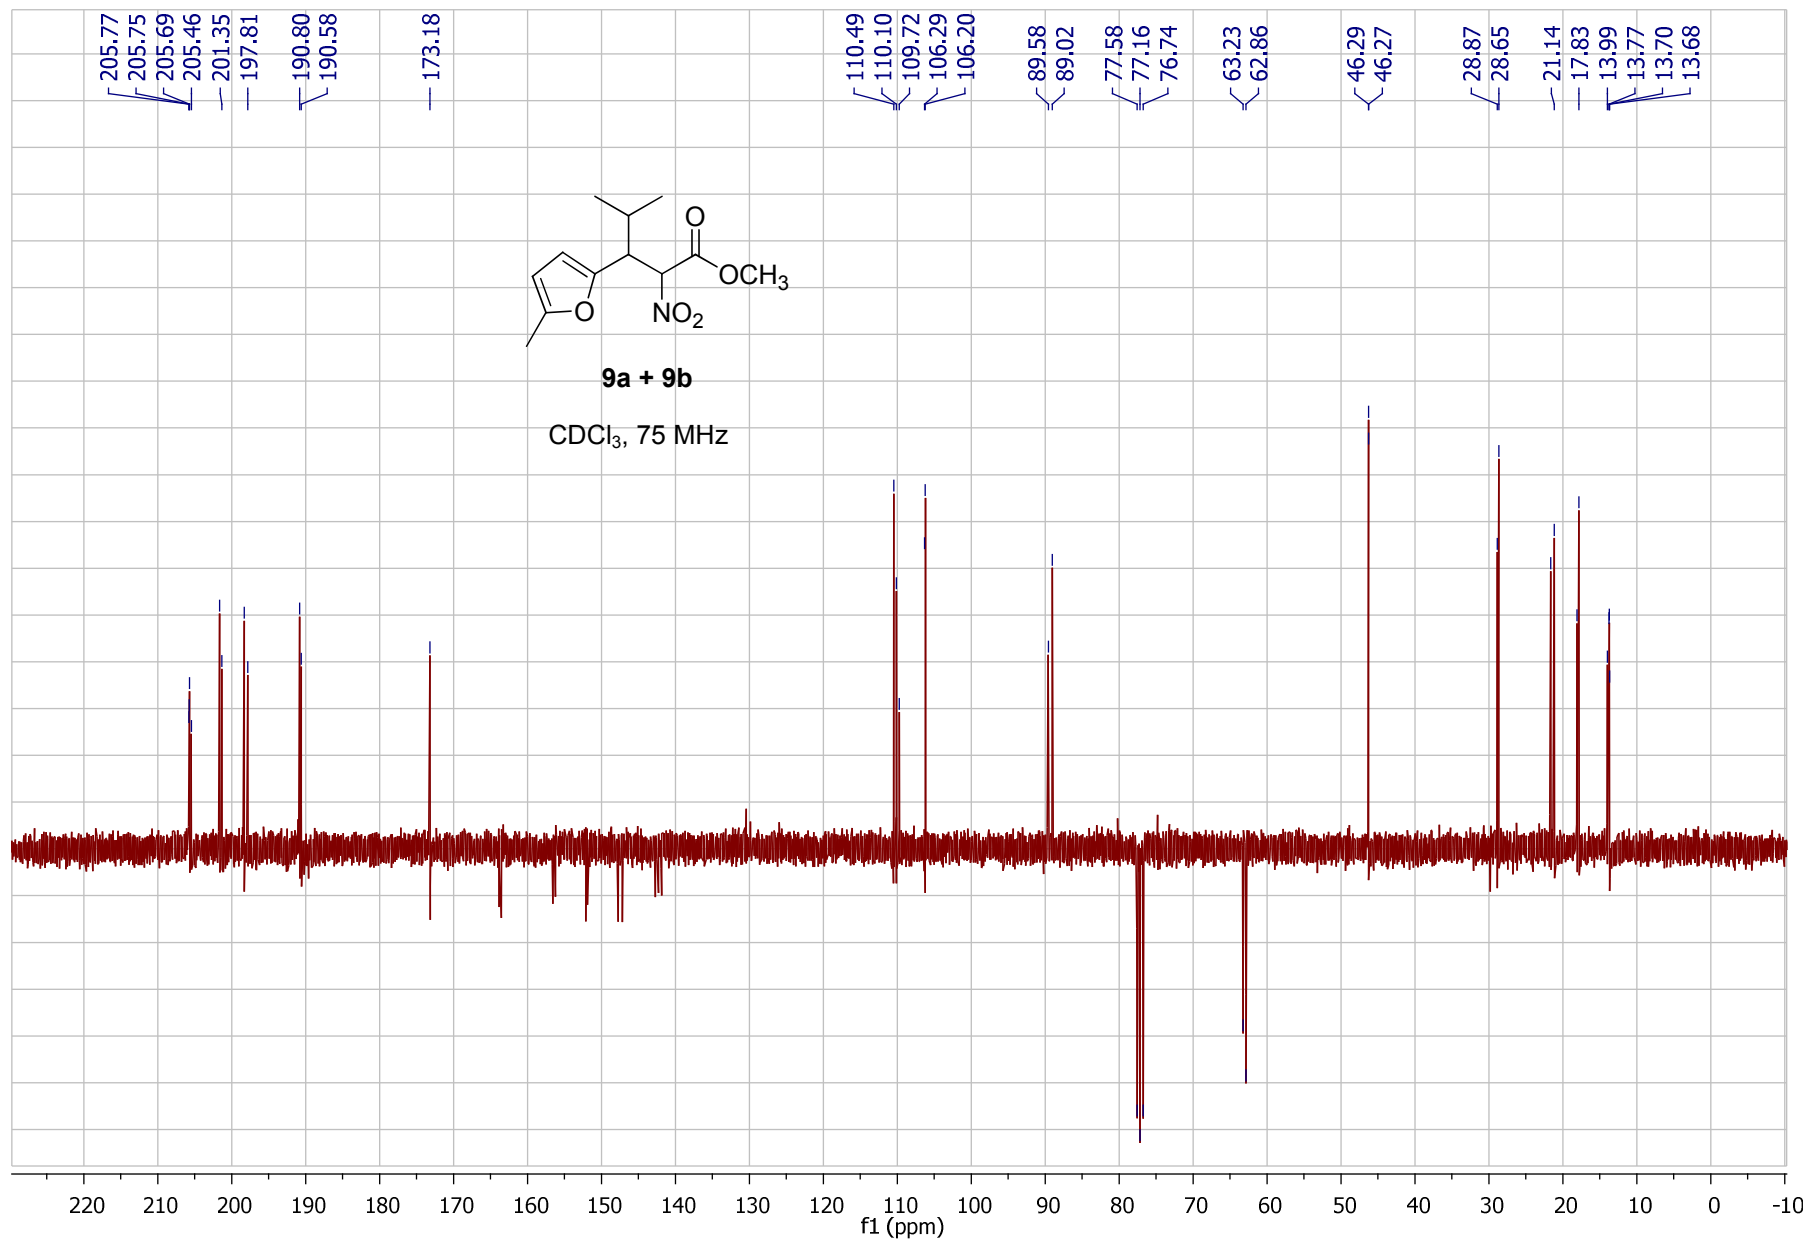

**Table S1.** Trimolecular condensation in various solvents.

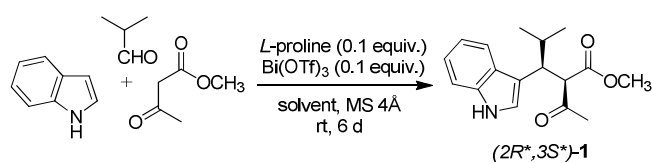

| Entry           | Solvent                     | Yield (%) <sup>a</sup> |
|-----------------|-----------------------------|------------------------|
| 1               | none                        | 0 <sup>e</sup>         |
| 2 <sup>b</sup>  | none                        | 36                     |
| 3               | PhCH <sub>3</sub>           | 23                     |
| 4               | THF                         | 25                     |
| 5               | CH <sub>3</sub> CN          | 23                     |
| 6               | MeOH                        | 50                     |
| 7 <sup>c</sup>  | MeOH                        | 78                     |
| 8 <sup>c</sup>  | EtOH                        | 55                     |
| 9 <sup>d</sup>  | H <sub>2</sub> O            | 0 <sup>e</sup>         |
| 10 <sup>d</sup> | MeOH/H <sub>2</sub> O (8:2) | 0 <sup>e</sup>         |

<sup>a</sup> Yield of purified product.

<sup>b</sup> 0.01 equiv. of Bi(OTf)<sub>3</sub> were used.

<sup>c</sup> Eu(OTf)<sub>3</sub> was used in the place of Bi(OTf)<sub>3</sub>.

<sup>d</sup> Reaction was performed without molecular sieves.

<sup>e</sup> A complex mixture of compounds was obtained.

**Table S2.** Trimolecular condensation in the presence of various europium salts.

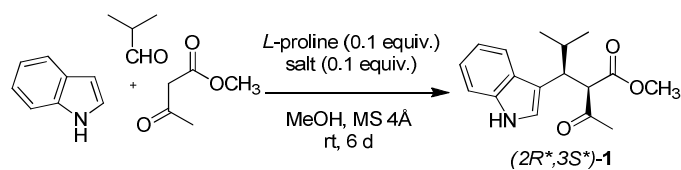

| Entry | Salt                                 | Yield (%) <sup>a</sup> |
|-------|--------------------------------------|------------------------|
| 1     | Eu(OTf) <sub>3</sub>                 | 78                     |
| 2     | Eu(NO <sub>3</sub> ) <sub>3</sub>    | 68                     |
| 3     | EuCl <sub>3</sub> ·6H <sub>2</sub> O | 48                     |

<sup>a</sup> Yield of purified product.



**Table S3.** Trimolecular condensation in the presence of various amounts of Eu(OTf)<sub>3</sub> and *L*-proline.

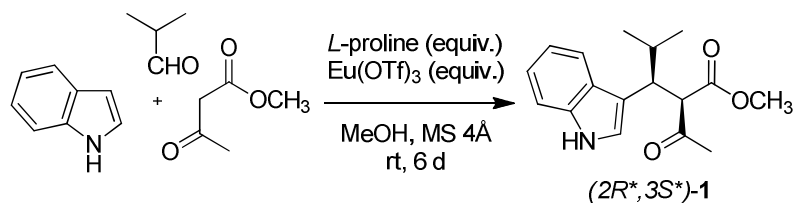

| Entry | Equiv.               |                   | Yield (%) <sup>a</sup> |
|-------|----------------------|-------------------|------------------------|
|       | Eu(OTf) <sub>3</sub> | <i>L</i> -proline |                        |
| 1     | 0.1                  | 0.1               | 78                     |
| 2     | 0.1                  | 0.2               | 19                     |
| 3     | 0.2                  | 0.1               | 67                     |
| 4     | 0.05                 | 0.05              | 48                     |

<sup>a</sup> Yield of purified product.

**Table S4.** Calculation of the environmental factor (E-factor)<sup>a</sup> for the trimolecular condensation in the presence of Eu(III) and Ti(IV).

|                             |                                                        | mass (mg)                  |                          |
|-----------------------------|--------------------------------------------------------|----------------------------|--------------------------|
|                             |                                                        | Eu(III)-catalyzed reaction | Ti(IV)-promoted reaction |
| <b>Materials in</b>         | Methyl acetoacetate <sup>b</sup>                       | 1016                       | 1016                     |
|                             | Isobutyraldehyde <sup>b</sup>                          | 631                        | 631                      |
|                             | Indole <sup>b</sup>                                    | 1025                       | 1025                     |
|                             | <i>L</i> -proline <sup>c</sup>                         | 101                        | -                        |
|                             | Eu(OTf) <sub>3</sub> <sup>c</sup>                      | 521                        | -                        |
|                             | TiCl <sub>4</sub> <sup>b</sup>                         | -                          | 1660                     |
|                             | Et <sub>3</sub> N <sup>b</sup>                         | -                          | 885                      |
|                             | MeOH <sup>d</sup>                                      | 15                         | -                        |
|                             | MeOH (work-up) <sup>d</sup>                            | 15                         | -                        |
|                             | CH <sub>2</sub> Cl <sub>2</sub> <sup>d</sup>           | -                          | 26                       |
|                             | CH <sub>2</sub> Cl <sub>2</sub> (work-up) <sup>d</sup> | -                          | 26                       |
|                             | HCl 1M <sup>d</sup>                                    | -                          | 729 <sup>f</sup>         |
|                             | Molecular sieves                                       | 3000                       | 3000                     |
| <b>Product out</b>          | Condensation product                                   | 1963 <sup>e</sup>          | 1131 <sup>g</sup>        |
| <b>E-factor<sup>a</sup></b> |                                                        | 2.23                       | 6.95                     |

<sup>a</sup> E-factor = [(mass of materials in) – (mass of product out)]/(mass of materials in). <sup>b</sup> 8.75 mmol (1.0 equiv.); <sup>c</sup> 0.87 mmol (0.1 equiv.); <sup>d</sup> 20 mL; <sup>e</sup> 6.83 mmol (78% yield); <sup>f</sup> mass of HCl (water was not included in calculations); <sup>g</sup> 3.94 mmol (45% yield).
